# Supplementary material for: Evaluating the PROMIS-29 v2.0 for use among older adults with multiple chronic conditions
Source: Springer Nature journal article supplement (doi:10.1007/s11136-018-1958-5), 2018-08-07
Supplement: MOESM1 [file 16019512]

## Sheet: dif
Grouping Variable	Item Number	Model 1 Chi Square	Model 3 Chi Square	Model 1 R Squared	Model 3 R Squared	Chi Square Difference	Prob Chi Sq	R Square Difference	B-H Corrected P Value (.01)
Age: 65-79 vs. 80+	Physical Function Q4	488.599	538.117	0.3249	0.3517	49.5183	1.767e-11	0.0268	0.000357
Age: 65-79 vs. 80+	Physical Function Q1	434.386	471.795	0.289	0.3098	37.4083	7.53166e-09	0.0208	0.000714
Age: 65-79 vs. 80+	Physical Function Q2	386.602	419.866	0.2623	0.2816	33.2641	5.98126e-08	0.0193	0.001071
Age: 65-79 vs. 80+	Physical Function Q3	383.527	410.377	0.2626	0.2783	26.8497	1.47796e-06	0.0157	0.001429
Age: 65-79 vs. 80+	Depression Q1	174.406	199.979	0.143	0.1625	25.5723	2.79928e-06	0.0195	0.001786
Age: 65-79 vs. 80+	Depression Q2	276.588	294.024	0.2102	0.2221	17.4363	0.00016359	0.0119	0.002143
Age: 65-79 vs. 80+	Social Q1	279.679	294.405	0.2019	0.2114	14.7259	0.000634324	0.0095	0.0025
Age: 65-79 vs. 80+	Social Q3	340.287	352.785	0.2393	0.247	12.4984	0.001932	0.0077	0.002857
Age: 65-79 vs. 80+	Social Q2	323.645	335.96	0.229	0.2366	12.315	0.00211754	0.0076	0.003214
Age: 65-79 vs. 80+	Fatigue Q2	290.889	300.579	0.2078	0.2139	9.6895	0.00786958	0.0061	0.003571
Age: 65-79 vs. 80+	Social Q4	345.377	355.005	0.2445	0.2504	9.6279	0.00811574	0.0059	0.003929
Age: 65-79 vs. 80+	Pain Q3	273.358	282.472	0.2038	0.2099	9.1135	0.0104961	0.0061	0.004286
Age: 65-79 vs. 80+	Fatigue Q4	266.746	274.017	0.1931	0.1978	7.2716	0.0263628	0.0047	0.004643
Age: 65-79 vs. 80+	Anxiety Q2	214.627	220.264	0.1723	0.1764	5.6374	0.0596835	0.0041	0.005
Age: 65-79 vs. 80+	Pain Q4	275.596	281.121	0.2015	0.2051	5.5251	0.0631306	0.0036	0.005357
Age: 65-79 vs. 80+	Fatigue Q1	265.773	271.296	0.1908	0.1944	5.5238	0.0631716	0.0036	0.005714
Age: 65-79 vs. 80+	Fatigue Q3	260.163	263.741	0.1884	0.1907	3.5775	0.167169	0.0023	0.006071
Age: 65-79 vs. 80+	Sleep Q3	101.772	105.064	0.0782	0.0807	3.2918	0.192839	0.0025	0.006429
Age: 65-79 vs. 80+	Anxiety Q3	233.04	235.829	0.1848	0.1868	2.789	0.247957	0.002	0.006786
Age: 65-79 vs. 80+	Pain Q1	264.728	267.254	0.1907	0.1924	2.5268	0.282691	0.0017	0.007143
Age: 65-79 vs. 80+	Depression Q3	273.35	275.82	0.2055	0.2071	2.4702	0.290806	0.0016	0.0075
Age: 65-79 vs. 80+	Sleep Q2	93.2391	95.331	0.0712	0.0727	2.0919	0.351358	0.0015	0.007857
Age: 65-79 vs. 80+	Depression Q4	244.492	246.466	0.2001	0.2016	1.9742	0.372656	0.0015	0.008214
Age: 65-79 vs. 80+	Pain Q2	284.748	286.526	0.2057	0.2068	1.7781	0.411046	0.0011	0.008571
Age: 65-79 vs. 80+	Sleep Q4	68.6989	69.8296	0.0548	0.0557	1.1307	0.568161	0.0009	0.008929
Age: 65-79 vs. 80+	Sleep Q1	84.0481	84.6523	0.0646	0.065	0.6042	0.739264	0.0004	0.009286
Age: 65-79 vs. 80+	Anxiety Q1	139.107	139.556	0.1124	0.1128	0.4494	0.798756	0.0004	0.009643
Age: 65-79 vs. 80+	Anxiety Q4	215.175	215.301	0.164	0.164	0.1259	0.93899	0	0.01
Arthritis: Has vs. Does not have	Pain Q1	244.849	256.844	0.1777	0.1856	11.9955	0.00248434	0.0079	0.000357
Arthritis: Has vs. Does not have	Physical Function Q2	440.155	449.285	0.2931	0.2982	9.1307	0.0104062	0.0051	0.000714
Arthritis: Has vs. Does not have	Pain Q2	270.353	276.064	0.1963	0.2	5.7108	0.0575328	0.0037	0.001071
Arthritis: Has vs. Does not have	Social Q3	357.769	361.584	0.25	0.2523	3.8146	0.148481	0.0023	0.001429
Arthritis: Has vs. Does not have	Pain Q4	270.326	273.18	0.198	0.1999	2.8544	0.23998	0.0019	0.001786
Arthritis: Has vs. Does not have	Depression Q1	191.266	193.842	0.1559	0.1578	2.5761	0.275808	0.0019	0.002143
Arthritis: Has vs. Does not have	Fatigue Q1	267.073	269.647	0.1917	0.1933	2.574	0.276098	0.0016	0.0025
Arthritis: Has vs. Does not have	Social Q4	372.127	374.456	0.2609	0.2623	2.3289	0.312094	0.0014	0.002857
Arthritis: Has vs. Does not have	Social Q1	300.044	302.166	0.215	0.2163	2.1225	0.346023	0.0013	0.003214
Arthritis: Has vs. Does not have	Fatigue Q2	300.058	301.837	0.2136	0.2147	1.7792	0.41082	0.0011	0.003571
Arthritis: Has vs. Does not have	Anxiety Q2	216.185	217.834	0.1734	0.1746	1.6489	0.438476	0.0012	0.003929
Arthritis: Has vs. Does not have	Anxiety Q4	215.702	217.243	0.1643	0.1654	1.5413	0.462712	0.0011	0.004286
Arthritis: Has vs. Does not have	Fatigue Q3	262.166	263.692	0.1897	0.1907	1.5262	0.466219	0.001	0.004643
Arthritis: Has vs. Does not have	Depression Q3	269.031	270.481	0.2025	0.2035	1.4494	0.48447	0.001	0.005
Arthritis: Has vs. Does not have	Pain Q3	266.92	268.169	0.1994	0.2003	1.2488	0.535583	0.0009	0.005357
Arthritis: Has vs. Does not have	Physical Function Q4	554.605	555.819	0.3604	0.361	1.2143	0.544902	0.0006	0.005714
Arthritis: Has vs. Does not have	Anxiety Q3	234.771	235.967	0.1861	0.1869	1.1964	0.5498	0.0008	0.006071
Arthritis: Has vs. Does not have	Physical Function Q3	420.094	421.241	0.2839	0.2846	1.1473	0.563465	0.0007	0.006429
Arthritis: Has vs. Does not have	Social Q2	345.859	346.782	0.2427	0.2433	0.9228	0.6304	0.0006	0.006786
Arthritis: Has vs. Does not have	Sleep Q2	96.3565	97.1091	0.0735	0.074	0.7526	0.686396	0.0005	0.007143
Arthritis: Has vs. Does not have	Depression Q2	297.393	298.114	0.2244	0.2249	0.7209	0.697362	0.0005	0.0075
Arthritis: Has vs. Does not have	Depression Q4	244.122	244.794	0.1998	0.2003	0.6716	0.714766	0.0005	0.007857
Arthritis: Has vs. Does not have	Sleep Q1	84.3617	84.9267	0.0648	0.0652	0.565	0.753897	0.0004	0.008214
Arthritis: Has vs. Does not have	Physical Function Q1	503.149	503.712	0.3268	0.3271	0.5631	0.754613	0.0003	0.008571
Arthritis: Has vs. Does not have	Sleep Q4	68.5486	68.9998	0.0547	0.055	0.4512	0.798037	0.0003	0.008929
Arthritis: Has vs. Does not have	Sleep Q3	103.664	103.741	0.0796	0.0797	0.0768	0.962328	0.0001	0.009286
Arthritis: Has vs. Does not have	Anxiety Q1	138.624	138.679	0.1121	0.1121	0.0549	0.972923	0	0.009643
Arthritis: Has vs. Does not have	Fatigue Q4	272.71	272.725	0.197	0.197	0.015	0.992528	0	0.01
Cancer: Has vs. Does not have	Social Q1	301.029	308.361	0.2156	0.2203	7.332	0.0255786	0.0047	0.000357
Cancer: Has vs. Does not have	Social Q4	374.334	379.251	0.2622	0.2652	4.9174	0.0855461	0.003	0.000714
Cancer: Has vs. Does not have	Social Q3	360.113	364.727	0.2514	0.2542	4.614	0.0995595	0.0028	0.001071
Cancer: Has vs. Does not have	Sleep Q4	68.9015	72.9804	0.055	0.0581	4.0789	0.1301	0.0031	0.001429
Cancer: Has vs. Does not have	Social Q2	348.053	351.49	0.2441	0.2462	3.4366	0.179371	0.0021	0.001786
Cancer: Has vs. Does not have	Physical Function Q2	446.791	449.948	0.2968	0.2986	3.1577	0.206212	0.0018	0.002143
Cancer: Has vs. Does not have	Physical Function Q1	501.881	504.618	0.3261	0.3276	2.7372	0.254463	0.0015	0.0025
Cancer: Has vs. Does not have	Depression Q4	243.353	245.713	0.1992	0.201	2.3603	0.307233	0.0018	0.002857
Cancer: Has vs. Does not have	Depression Q3	266.761	269.094	0.201	0.2026	2.3333	0.311408	0.0016	0.003214
Cancer: Has vs. Does not have	Physical Function Q3	422.594	424.309	0.2854	0.2864	1.7151	0.4242	0.001	0.003571
Cancer: Has vs. Does not have	Sleep Q1	83.7902	85.4073	0.0644	0.0656	1.6171	0.445504	0.0012	0.003929
Cancer: Has vs. Does not have	Sleep Q2	95.4022	96.8583	0.0728	0.0738	1.4561	0.48285	0.001	0.004286
Cancer: Has vs. Does not have	Fatigue Q2	298.87	300.175	0.2128	0.2137	1.3049	0.520768	0.0009	0.004643
Cancer: Has vs. Does not have	Anxiety Q4	215.618	216.915	0.1643	0.1652	1.2974	0.522725	0.0009	0.005
Cancer: Has vs. Does not have	Pain Q4	277.259	278.407	0.2025	0.2033	1.1485	0.563127	0.0008	0.005357
Cancer: Has vs. Does not have	Depression Q1	191.956	193.079	0.1564	0.1573	1.1226	0.570467	0.0009	0.005714
Cancer: Has vs. Does not have	Pain Q2	283.897	284.92	0.2051	0.2058	1.0234	0.599476	0.0007	0.006071
Cancer: Has vs. Does not have	Fatigue Q4	272.371	273.332	0.1968	0.1974	0.9608	0.618536	0.0006	0.006429
Cancer: Has vs. Does not have	Fatigue Q1	268.598	269.446	0.1926	0.1932	0.848	0.654424	0.0006	0.006786
Cancer: Has vs. Does not have	Sleep Q3	103.289	104.032	0.0794	0.0799	0.7433	0.689596	0.0005	0.007143
Cancer: Has vs. Does not have	Depression Q2	297.161	297.767	0.2242	0.2246	0.6057	0.73871	0.0004	0.0075
Cancer: Has vs. Does not have	Physical Function Q4	559.409	559.906	0.3629	0.3632	0.4971	0.779931	0.0003	0.007857
Cancer: Has vs. Does not have	Anxiety Q1	139.069	139.471	0.1124	0.1127	0.4026	0.817667	0.0003	0.008214
Cancer: Has vs. Does not have	Anxiety Q3	234.584	234.957	0.1859	0.1862	0.373	0.829859	0.0003	0.008571
Cancer: Has vs. Does not have	Pain Q3	276.422	276.792	0.2058	0.2061	0.3698	0.831187	0.0003	0.008929
Cancer: Has vs. Does not have	Pain Q1	263.598	263.888	0.19	0.1902	0.2905	0.864806	0.0002	0.009286
Cancer: Has vs. Does not have	Fatigue Q3	263.359	263.422	0.1905	0.1905	0.0633	0.968846	0	0.009643
Cancer: Has vs. Does not have	Anxiety Q2	216.839	216.882	0.1739	0.1739	0.0433	0.978583	0	0.01
Chronic Lung Disease: Has vs. Does not have	Depression Q2	296.279	302.643	0.2236	0.2279	6.364	0.0415026	0.0043	0.000357
Chronic Lung Disease: Has vs. Does not have	Physical Function Q4	555.456	561.648	0.3608	0.3641	6.1914	0.0452433	0.0033	0.000714
Chronic Lung Disease: Has vs. Does not have	Social Q4	369.289	374.313	0.2591	0.2622	5.0244	0.0810896	0.0031	0.001071
Chronic Lung Disease: Has vs. Does not have	Social Q2	344.866	349.511	0.2421	0.245	4.6456	0.0979988	0.0029	0.001429
Chronic Lung Disease: Has vs. Does not have	Physical Function Q3	417.167	421.794	0.2823	0.2849	4.6271	0.0989095	0.0026	0.001786
Chronic Lung Disease: Has vs. Does not have	Fatigue Q2	297.056	301.5	0.2117	0.2145	4.4436	0.108414	0.0028	0.002143
Chronic Lung Disease: Has vs. Does not have	Anxiety Q1	138.801	142.847	0.1122	0.1153	4.0461	0.132251	0.0031	0.0025
Chronic Lung Disease: Has vs. Does not have	Physical Function Q1	500.403	503.69	0.3253	0.3271	3.2876	0.193244	0.0018	0.002857
Chronic Lung Disease: Has vs. Does not have	Pain Q2	278.995	281.92	0.202	0.2038	2.9247	0.231691	0.0018	0.003214
Chronic Lung Disease: Has vs. Does not have	Pain Q4	275.814	278.469	0.2016	0.2033	2.6553	0.2651	0.0017	0.003571
Chronic Lung Disease: Has vs. Does not have	Social Q3	356.463	358.652	0.2492	0.2506	2.1883	0.334824	0.0014	0.003929
Chronic Lung Disease: Has vs. Does not have	Fatigue Q1	268.596	270.745	0.1926	0.194	2.1488	0.341503	0.0014	0.004286
Chronic Lung Disease: Has vs. Does not have	Anxiety Q4	215.946	217.95	0.1645	0.1659	2.004	0.367144	0.0014	0.004643
Chronic Lung Disease: Has vs. Does not have	Pain Q3	272.075	274.052	0.2029	0.2042	1.9764	0.372246	0.0013	0.005
Chronic Lung Disease: Has vs. Does not have	Depression Q3	269.03	270.715	0.2025	0.2037	1.6851	0.430611	0.0012	0.005357
Chronic Lung Disease: Has vs. Does not have	Pain Q1	259.23	260.905	0.1871	0.1882	1.6752	0.432748	0.0011	0.005714
Chronic Lung Disease: Has vs. Does not have	Social Q1	300.53	302.196	0.2153	0.2163	1.6663	0.434678	0.001	0.006071
Chronic Lung Disease: Has vs. Does not have	Anxiety Q3	235.049	236.639	0.1863	0.1874	1.5906	0.451446	0.0011	0.006429
Chronic Lung Disease: Has vs. Does not have	Depression Q1	192.309	193.853	0.1567	0.1578	1.5446	0.461949	0.0011	0.006786
Chronic Lung Disease: Has vs. Does not have	Depression Q4	245.145	246.616	0.2006	0.2017	1.4713	0.479194	0.0011	0.007143
Chronic Lung Disease: Has vs. Does not have	Sleep Q1	82.9098	84.2056	0.0637	0.0647	1.2958	0.523143	0.001	0.0075
Chronic Lung Disease: Has vs. Does not have	Physical Function Q2	441.418	442.308	0.2938	0.2943	0.8896	0.640952	0.0005	0.007857
Chronic Lung Disease: Has vs. Does not have	Sleep Q3	101.045	101.931	0.0777	0.0784	0.8853	0.642332	0.0007	0.008214
Chronic Lung Disease: Has vs. Does not have	Fatigue Q3	263.87	264.57	0.1908	0.1912	0.7009	0.704371	0.0004	0.008571
Chronic Lung Disease: Has vs. Does not have	Sleep Q4	67.0485	67.742	0.0535	0.0541	0.6935	0.706982	0.0006	0.008929
Chronic Lung Disease: Has vs. Does not have	Fatigue Q4	271.565	271.806	0.1962	0.1964	0.2406	0.886654	0.0002	0.009286
Chronic Lung Disease: Has vs. Does not have	Sleep Q2	95.7437	95.8871	0.073	0.0731	0.1434	0.93081	0.0001	0.009643
Chronic Lung Disease: Has vs. Does not have	Anxiety Q2	216.203	216.251	0.1734	0.1735	0.0473	0.976627	0.0001	0.01
Congestive Heart Failure: Has vs. Does not have	Pain Q3	271.842	292.055	0.2027	0.2162	20.2131	4.08114e-05	0.0135	0.000357
Congestive Heart Failure: Has vs. Does not have	Fatigue Q4	266.833	277.757	0.1931	0.2003	10.9241	0.00424484	0.0072	0.000714
Congestive Heart Failure: Has vs. Does not have	Physical Function Q4	542.865	551.839	0.3542	0.3589	8.9739	0.0112549	0.0047	0.001071
Congestive Heart Failure: Has vs. Does not have	Fatigue Q1	267.96	276.015	0.1922	0.1974	8.0552	0.017817	0.0052	0.001429
Congestive Heart Failure: Has vs. Does not have	Pain Q4	275.615	283.522	0.2015	0.2066	7.9075	0.0191826	0.0051	0.001786
Congestive Heart Failure: Has vs. Does not have	Physical Function Q1	497.111	503.521	0.3235	0.327	6.4101	0.0405569	0.0035	0.002143
Congestive Heart Failure: Has vs. Does not have	Anxiety Q1	138.606	144.206	0.1121	0.1164	5.5996	0.0608222	0.0043	0.0025
Congestive Heart Failure: Has vs. Does not have	Physical Function Q3	413.712	419.311	0.2803	0.2835	5.5986	0.0608526	0.0032	0.002857
Congestive Heart Failure: Has vs. Does not have	Anxiety Q2	216.386	221.359	0.1736	0.1772	4.9725	0.0832215	0.0036	0.003214
Congestive Heart Failure: Has vs. Does not have	Fatigue Q3	263.2	268.018	0.1904	0.1935	4.8189	0.0898647	0.0031	0.003571
Congestive Heart Failure: Has vs. Does not have	Social Q1	296.757	301.569	0.2129	0.2159	4.812	0.0901753	0.003	0.003929
Congestive Heart Failure: Has vs. Does not have	Physical Function Q2	436.613	441.129	0.2911	0.2936	4.5156	0.10458	0.0025	0.004286
Congestive Heart Failure: Has vs. Does not have	Fatigue Q2	291.341	295.614	0.208	0.2108	4.2724	0.118103	0.0028	0.004643
Congestive Heart Failure: Has vs. Does not have	Pain Q2	281.925	286.186	0.2039	0.2066	4.2608	0.11879	0.0027	0.005
Congestive Heart Failure: Has vs. Does not have	Sleep Q2	95.7478	98.9959	0.073	0.0754	3.2481	0.197099	0.0024	0.005357
Congestive Heart Failure: Has vs. Does not have	Depression Q3	264.945	268.138	0.1997	0.2019	3.1927	0.202635	0.0022	0.005714
Congestive Heart Failure: Has vs. Does not have	Anxiety Q3	232.609	235.797	0.1845	0.1868	3.1874	0.203172	0.0023	0.006071
Congestive Heart Failure: Has vs. Does not have	Social Q4	369.212	372.342	0.2591	0.261	3.1294	0.209151	0.0019	0.006429
Congestive Heart Failure: Has vs. Does not have	Pain Q1	264.212	266.833	0.1904	0.1921	2.621	0.269685	0.0017	0.006786
Congestive Heart Failure: Has vs. Does not have	Anxiety Q4	216.054	218.126	0.1646	0.166	2.0719	0.354889	0.0014	0.007143
Congestive Heart Failure: Has vs. Does not have	Depression Q4	242.721	244.545	0.1988	0.2001	1.8239	0.40174	0.0013	0.0075
Congestive Heart Failure: Has vs. Does not have	Social Q3	353.351	354.653	0.2473	0.2481	1.3018	0.521576	0.0008	0.007857
Congestive Heart Failure: Has vs. Does not have	Sleep Q1	82.398	83.3488	0.0634	0.0641	0.9508	0.621636	0.0007	0.008214
Congestive Heart Failure: Has vs. Does not have	Depression Q1	192.811	193.703	0.1571	0.1577	0.8926	0.639992	0.0006	0.008571
Congestive Heart Failure: Has vs. Does not have	Social Q2	344.524	345.336	0.2419	0.2424	0.8116	0.666443	0.0005	0.008929
Congestive Heart Failure: Has vs. Does not have	Depression Q2	297.64	298.432	0.2245	0.2251	0.7924	0.672872	0.0006	0.009286
Congestive Heart Failure: Has vs. Does not have	Sleep Q4	66.951	67.6025	0.0535	0.054	0.6515	0.721986	0.0005	0.009643
Congestive Heart Failure: Has vs. Does not have	Sleep Q3	100.958	101.552	0.0776	0.0781	0.5944	0.742895	0.0005	0.01
Depression: Has vs. Does not have	Depression Q3	222.253	270.627	0.1702	0.2036	48.374	3.13126e-11	0.0334	0.000357
Depression: Has vs. Does not have	Depression Q4	225.484	238.146	0.1858	0.1954	12.6614	0.00178079	0.0096	0.000714
Depression: Has vs. Does not have	Anxiety Q2	200.902	213.563	0.162	0.1715	12.6611	0.00178105	0.0095	0.001071
Depression: Has vs. Does not have	Pain Q2	271.42	278.501	0.197	0.2016	7.081	0.0289988	0.0046	0.001429
Depression: Has vs. Does not have	Anxiety Q3	215.702	222.624	0.1721	0.1772	6.9213	0.0314093	0.0051	0.001786
Depression: Has vs. Does not have	Fatigue Q2	277.605	283.824	0.1992	0.2032	6.2187	0.04463	0.004	0.002143
Depression: Has vs. Does not have	Fatigue Q4	259.09	264.813	0.1881	0.1918	5.7229	0.0571858	0.0037	0.0025
Depression: Has vs. Does not have	Pain Q4	269.434	274.879	0.1974	0.201	5.4454	0.0656971	0.0036	0.002857
Depression: Has vs. Does not have	Anxiety Q1	129.302	134.382	0.1049	0.1088	5.0795	0.0788861	0.0039	0.003214
Depression: Has vs. Does not have	Pain Q1	253.392	258.444	0.1833	0.1866	5.0518	0.0799863	0.0033	0.003571
Depression: Has vs. Does not have	Anxiety Q4	203.568	208.139	0.1558	0.159	4.5716	0.101693	0.0032	0.003929
Depression: Has vs. Does not have	Physical Function Q2	439.682	444.221	0.2928	0.2954	4.5384	0.103395	0.0026	0.004286
Depression: Has vs. Does not have	Pain Q3	264.6	268.596	0.1979	0.2006	3.9955	0.13564	0.0027	0.004643
Depression: Has vs. Does not have	Sleep Q3	98.2854	102.041	0.0757	0.0784	3.7552	0.152957	0.0027	0.005
Depression: Has vs. Does not have	Depression Q1	178.284	181.483	0.146	0.1484	3.1985	0.202048	0.0024	0.005357
Depression: Has vs. Does not have	Fatigue Q1	266.263	269.143	0.1911	0.193	2.8801	0.236916	0.0019	0.005714
Depression: Has vs. Does not have	Physical Function Q1	500.283	502.968	0.3252	0.3267	2.6845	0.261257	0.0015	0.006071
Depression: Has vs. Does not have	Social Q1	296.55	298.839	0.2127	0.2142	2.2887	0.318431	0.0015	0.006429
Depression: Has vs. Does not have	Sleep Q4	64.8677	66.9888	0.0518	0.0535	2.1211	0.346265	0.0017	0.006786
Depression: Has vs. Does not have	Sleep Q2	93.8038	95.584	0.0716	0.0729	1.7802	0.410615	0.0013	0.007143
Depression: Has vs. Does not have	Physical Function Q3	420.147	421.845	0.284	0.2849	1.6986	0.427714	0.0009	0.0075
Depression: Has vs. Does not have	Fatigue Q3	260.714	262.364	0.1887	0.1898	1.6507	0.438082	0.0011	0.007857
Depression: Has vs. Does not have	Social Q3	353.023	354.651	0.2471	0.2481	1.6282	0.443038	0.001	0.008214
Depression: Has vs. Does not have	Social Q2	340.844	342.038	0.2396	0.2404	1.1934	0.550626	0.0008	0.008571
Depression: Has vs. Does not have	Social Q4	365.666	366.7	0.2569	0.2576	1.0332	0.596545	0.0007	0.008929
Depression: Has vs. Does not have	Sleep Q1	82.5629	82.9573	0.0635	0.0638	0.3944	0.821026	0.0003	0.009286
Depression: Has vs. Does not have	Depression Q2	287.068	287.075	0.2174	0.2174	0.0061	0.996955	0	0.009643
Depression: Has vs. Does not have	Physical Function Q4	554.058	554.062	0.3601	0.3601	0.0039	0.998052	0	0.01
Diabetes: Has vs. Does not have	Physical Function Q3	416.66	425.346	0.282	0.287	8.6861	0.0129968	0.005	0.000357
Diabetes: Has vs. Does not have	Fatigue Q3	262.857	269.257	0.1901	0.1943	6.4003	0.0407561	0.0042	0.000714
Diabetes: Has vs. Does not have	Depression Q1	191.173	195.018	0.1558	0.1587	3.8452	0.146226	0.0029	0.001071
Diabetes: Has vs. Does not have	Pain Q3	270.562	273.824	0.2019	0.2041	3.2611	0.195822	0.0022	0.001429
Diabetes: Has vs. Does not have	Anxiety Q2	212.876	216.07	0.171	0.1733	3.1931	0.202594	0.0023	0.001786
Diabetes: Has vs. Does not have	Physical Function Q4	552.488	555.268	0.3593	0.3607	2.78	0.249075	0.0014	0.002143
Diabetes: Has vs. Does not have	Depression Q4	244.086	246.801	0.1998	0.2018	2.715	0.257303	0.002	0.0025
Diabetes: Has vs. Does not have	Fatigue Q1	267.716	269.911	0.1921	0.1935	2.1952	0.333671	0.0014	0.002857
Diabetes: Has vs. Does not have	Fatigue Q4	272.616	274.793	0.1969	0.1983	2.1771	0.336704	0.0014	0.003214
Diabetes: Has vs. Does not have	Pain Q4	273.897	275.791	0.2003	0.2016	1.894	0.387903	0.0013	0.003571
Diabetes: Has vs. Does not have	Depression Q3	268.76	270.315	0.2023	0.2034	1.5545	0.459668	0.0011	0.003929
Diabetes: Has vs. Does not have	Physical Function Q2	440.844	442.145	0.2935	0.2942	1.3016	0.521628	0.0007	0.004286
Diabetes: Has vs. Does not have	Social Q4	371.224	372.512	0.2603	0.2611	1.2884	0.525082	0.0008	0.004643
Diabetes: Has vs. Does not have	Anxiety Q3	234.27	235.549	0.1857	0.1866	1.2792	0.527503	0.0009	0.005
Diabetes: Has vs. Does not have	Anxiety Q1	137.578	138.763	0.1113	0.1122	1.185	0.552943	0.0009	0.005357
Diabetes: Has vs. Does not have	Social Q2	345.848	346.845	0.2427	0.2433	0.9974	0.60732	0.0006	0.005714
Diabetes: Has vs. Does not have	Depression Q2	297.268	298.253	0.2243	0.2249	0.9851	0.611066	0.0006	0.006071
Diabetes: Has vs. Does not have	Pain Q2	280.961	281.82	0.2032	0.2038	0.8589	0.650867	0.0006	0.006429
Diabetes: Has vs. Does not have	Social Q1	300.385	301.182	0.2152	0.2157	0.7968	0.671393	0.0005	0.006786
Diabetes: Has vs. Does not have	Sleep Q3	103.025	103.734	0.0792	0.0797	0.7098	0.701244	0.0005	0.007143
Diabetes: Has vs. Does not have	Sleep Q2	96.7065	97.3216	0.0737	0.0742	0.6151	0.735246	0.0005	0.0075
Diabetes: Has vs. Does not have	Sleep Q1	84.201	84.6367	0.0647	0.065	0.4357	0.804246	0.0003	0.007857
Diabetes: Has vs. Does not have	Anxiety Q4	214.264	214.699	0.1633	0.1636	0.4347	0.804648	0.0003	0.008214
Diabetes: Has vs. Does not have	Pain Q1	260.736	261.026	0.1881	0.1883	0.2897	0.865152	0.0002	0.008571
Diabetes: Has vs. Does not have	Fatigue Q2	299.588	299.868	0.2133	0.2135	0.2798	0.869445	0.0002	0.008929
Diabetes: Has vs. Does not have	Sleep Q4	68.5251	68.7235	0.0547	0.0548	0.1984	0.905562	0.0001	0.009286
Diabetes: Has vs. Does not have	Social Q3	357.491	357.556	0.2498	0.2499	0.0652	0.967926	0.0001	0.009643
Diabetes: Has vs. Does not have	Physical Function Q1	502.026	502.067	0.3262	0.3262	0.0412	0.979611	0	0.01
Gender: Male vs. Female	Physical Function Q1	460.945	493.282	0.3038	0.3215	32.3366	9.51035e-08	0.0177	0.000357
Gender: Male vs. Female	Pain Q4	251.5	278.409	0.1855	0.2033	26.9087	1.43499e-06	0.0178	0.000714
Gender: Male vs. Female	Physical Function Q4	526.888	551.29	0.3457	0.3586	24.4013	5.02719e-06	0.0129	0.001071
Gender: Male vs. Female	Social Q3	334.108	357.244	0.2355	0.2497	23.1356	9.46604e-06	0.0142	0.001429
Gender: Male vs. Female	Sleep Q4	63.964	80.0321	0.0511	0.0636	16.0681	0.000324232	0.0125	0.001786
Gender: Male vs. Female	Anxiety Q3	228.887	243.469	0.1818	0.1923	14.5819	0.00068168	0.0105	0.002143
Gender: Male vs. Female	Physical Function Q2	433.274	447.39	0.2892	0.2971	14.1151	0.000860885	0.0079	0.0025
Gender: Male vs. Female	Pain Q2	273.214	286.617	0.1982	0.2069	13.403	0.00122907	0.0087	0.002857
Gender: Male vs. Female	Physical Function Q3	404.673	417.104	0.275	0.2822	12.4312	0.00199802	0.0072	0.003214
Gender: Male vs. Female	Fatigue Q1	255.947	266.891	0.1844	0.1915	10.9438	0.00420324	0.0071	0.003571
Gender: Male vs. Female	Fatigue Q4	259.997	270.262	0.1887	0.1954	10.2655	0.00590031	0.0067	0.003929
Gender: Male vs. Female	Fatigue Q2	287.194	296.665	0.2054	0.2114	9.4709	0.0087785	0.006	0.004286
Gender: Male vs. Female	Pain Q3	264.141	273.498	0.1976	0.2039	9.3569	0.00929341	0.0063	0.004643
Gender: Male vs. Female	Pain Q1	255.567	264.627	0.1847	0.1907	9.0593	0.0107844	0.006	0.005
Gender: Male vs. Female	Social Q2	342.791	351.133	0.2408	0.246	8.3423	0.0154345	0.0052	0.005357
Gender: Male vs. Female	Social Q1	293.412	300.799	0.2107	0.2154	7.3871	0.0248835	0.0047	0.005714
Gender: Male vs. Female	Anxiety Q4	215.155	221.564	0.1639	0.1684	6.4088	0.0405832	0.0045	0.006071
Gender: Male vs. Female	Depression Q1	191.54	197.802	0.1561	0.1608	6.2618	0.0436785	0.0047	0.006429
Gender: Male vs. Female	Anxiety Q1	137.225	143.353	0.111	0.1157	6.1275	0.0467122	0.0047	0.006786
Gender: Male vs. Female	Social Q4	367.824	371.264	0.2582	0.2603	3.44	0.179066	0.0021	0.007143
Gender: Male vs. Female	Anxiety Q2	218.422	221.729	0.1751	0.1775	3.3068	0.191398	0.0024	0.0075
Gender: Male vs. Female	Depression Q4	243.885	246.901	0.1996	0.2019	3.0167	0.221275	0.0023	0.007857
Gender: Male vs. Female	Fatigue Q3	254.365	257.15	0.1846	0.1864	2.7848	0.248478	0.0018	0.008214
Gender: Male vs. Female	Sleep Q3	102.484	104.993	0.0788	0.0806	2.5097	0.285119	0.0018	0.008571
Gender: Male vs. Female	Depression Q2	295.061	297.479	0.2228	0.2244	2.4187	0.298391	0.0016	0.008929
Gender: Male vs. Female	Depression Q3	268.39	270.072	0.2021	0.2032	1.682	0.431279	0.0011	0.009286
Gender: Male vs. Female	Sleep Q2	93.2993	94.3472	0.0712	0.072	1.0479	0.592177	0.0008	0.009643
Gender: Male vs. Female	Sleep Q1	84.281	84.707	0.0648	0.0651	0.426	0.808156	0.0003	0.01
Home Health Encounters: None vs. Any	Physical Function Q2	416.988	446.437	0.2799	0.2966	29.4493	4.02871e-07	0.0167	0.000357
Home Health Encounters: None vs. Any	Physical Function Q3	400.321	424.678	0.2725	0.2866	24.3565	5.14107e-06	0.0141	0.000714
Home Health Encounters: None vs. Any	Physical Function Q1	479.67	501.729	0.3141	0.326	22.0593	1.62138e-05	0.0119	0.001071
Home Health Encounters: None vs. Any	Physical Function Q4	546.702	561.145	0.3562	0.3638	14.4426	0.000730852	0.0076	0.001429
Home Health Encounters: None vs. Any	Fatigue Q2	287.271	297.596	0.2054	0.212	10.3249	0.00572765	0.0066	0.001786
Home Health Encounters: None vs. Any	Fatigue Q4	264.553	273.806	0.1917	0.1977	9.2531	0.00978847	0.006	0.002143
Home Health Encounters: None vs. Any	Sleep Q3	102.817	111.912	0.079	0.0857	9.0945	0.0105963	0.0067	0.0025
Home Health Encounters: None vs. Any	Social Q3	347.143	355.99	0.2435	0.2489	8.8472	0.011991	0.0054	0.002857
Home Health Encounters: None vs. Any	Social Q2	337.74	346.457	0.2377	0.2431	8.7166	0.0128001	0.0054	0.003214
Home Health Encounters: None vs. Any	Fatigue Q1	258.662	267.305	0.1862	0.1918	8.643	0.0132799	0.0056	0.003571
Home Health Encounters: None vs. Any	Social Q1	295.498	303.23	0.2121	0.217	7.7316	0.0209462	0.0049	0.003929
Home Health Encounters: None vs. Any	Depression Q2	294.928	301.871	0.2227	0.2274	6.9432	0.0310673	0.0047	0.004286
Home Health Encounters: None vs. Any	Social Q4	368.394	375.162	0.2586	0.2627	6.7672	0.0339251	0.0041	0.004643
Home Health Encounters: None vs. Any	Sleep Q1	83.5361	89.9417	0.0642	0.069	6.4056	0.0406482	0.0048	0.005
Home Health Encounters: None vs. Any	Fatigue Q3	256.532	262.798	0.186	0.1901	6.2658	0.0435912	0.0041	0.005357
Home Health Encounters: None vs. Any	Anxiety Q3	235.577	241.353	0.1866	0.1908	5.7758	0.055693	0.0042	0.005714
Home Health Encounters: None vs. Any	Pain Q3	276.66	281.726	0.206	0.2094	5.0664	0.0794045	0.0034	0.006071
Home Health Encounters: None vs. Any	Anxiety Q2	213.77	218.373	0.1716	0.175	4.6034	0.100089	0.0034	0.006429
Home Health Encounters: None vs. Any	Anxiety Q1	137.585	142.115	0.1113	0.1148	4.5299	0.103835	0.0035	0.006786
Home Health Encounters: None vs. Any	Depression Q1	189.348	193.454	0.1544	0.1575	4.1063	0.12833	0.0031	0.007143
Home Health Encounters: None vs. Any	Anxiety Q4	216.474	219.113	0.1649	0.1667	2.6395	0.267202	0.0018	0.0075
Home Health Encounters: None vs. Any	Sleep Q4	68.1767	70.5843	0.0544	0.0563	2.4076	0.300052	0.0019	0.007857
Home Health Encounters: None vs. Any	Depression Q4	241.54	243.717	0.1979	0.1995	2.1769	0.336738	0.0016	0.008214
Home Health Encounters: None vs. Any	Pain Q4	277.761	278.947	0.2029	0.2037	1.1861	0.552639	0.0008	0.008571
Home Health Encounters: None vs. Any	Pain Q2	284.752	285.806	0.2057	0.2064	1.0541	0.590344	0.0007	0.008929
Home Health Encounters: None vs. Any	Sleep Q2	96.5186	97.2346	0.0736	0.0741	0.716	0.699073	0.0005	0.009286
Home Health Encounters: None vs. Any	Depression Q3	267.774	268.367	0.2017	0.2021	0.5925	0.743602	0.0004	0.009643
Home Health Encounters: None vs. Any	Pain Q1	264.23	264.613	0.1904	0.1906	0.3827	0.825843	0.0002	0.01
Hospitalizations: None vs. Any	Fatigue Q3	259.538	267.456	0.188	0.1931	7.9184	0.0190784	0.0051	0.000357
Hospitalizations: None vs. Any	Social Q4	370.878	377.824	0.2601	0.2643	6.946	0.0310238	0.0042	0.000714
Hospitalizations: None vs. Any	Physical Function Q1	497.382	502.921	0.3237	0.3266	5.5386	0.0627059	0.0029	0.001071
Hospitalizations: None vs. Any	Fatigue Q1	269.2	274.636	0.193	0.1966	5.436	0.0660066	0.0036	0.001429
Hospitalizations: None vs. Any	Physical Function Q4	555.918	560.311	0.3611	0.3634	4.3929	0.111197	0.0023	0.001786
Hospitalizations: None vs. Any	Anxiety Q2	214.082	217.841	0.1719	0.1746	3.7591	0.152659	0.0027	0.002143
Hospitalizations: None vs. Any	Depression Q2	295.643	299.166	0.2232	0.2256	3.5223	0.171847	0.0024	0.0025
Hospitalizations: None vs. Any	Pain Q3	277.841	280.476	0.2068	0.2085	2.635	0.267804	0.0017	0.002857
Hospitalizations: None vs. Any	Social Q1	299.454	302.066	0.2146	0.2163	2.612	0.270901	0.0017	0.003214
Hospitalizations: None vs. Any	Depression Q4	241.458	244.035	0.1978	0.1998	2.5777	0.275588	0.002	0.003571
Hospitalizations: None vs. Any	Fatigue Q4	274.411	275.988	0.1981	0.1991	1.5768	0.454572	0.001	0.003929
Hospitalizations: None vs. Any	Pain Q1	262.728	264.218	0.1894	0.1904	1.4903	0.474663	0.001	0.004286
Hospitalizations: None vs. Any	Anxiety Q3	234.158	235.544	0.1856	0.1866	1.3857	0.500149	0.001	0.004643
Hospitalizations: None vs. Any	Pain Q2	284.415	285.714	0.2055	0.2063	1.299	0.522307	0.0008	0.005
Hospitalizations: None vs. Any	Sleep Q4	67.6151	68.6189	0.054	0.0547	1.0038	0.605379	0.0007	0.005357
Hospitalizations: None vs. Any	Sleep Q1	83.6044	84.5943	0.0643	0.065	0.9899	0.609601	0.0007	0.005714
Hospitalizations: None vs. Any	Social Q3	359.584	360.439	0.2511	0.2516	0.8545	0.6523	0.0005	0.006071
Hospitalizations: None vs. Any	Physical Function Q3	423.794	424.595	0.2861	0.2865	0.8014	0.669851	0.0004	0.006429
Hospitalizations: None vs. Any	Fatigue Q2	297.73	298.499	0.2121	0.2126	0.7691	0.680757	0.0005	0.006786
Hospitalizations: None vs. Any	Depression Q3	267.396	268.153	0.2014	0.2019	0.7571	0.684854	0.0005	0.007143
Hospitalizations: None vs. Any	Sleep Q3	102.16	102.849	0.0785	0.079	0.6894	0.708433	0.0005	0.0075
Hospitalizations: None vs. Any	Physical Function Q2	446.437	447.016	0.2966	0.2969	0.5788	0.748713	0.0003	0.007857
Hospitalizations: None vs. Any	Depression Q1	189.984	190.556	0.1549	0.1553	0.5713	0.751526	0.0004	0.008214
Hospitalizations: None vs. Any	Social Q2	348	348.543	0.244	0.2444	0.5427	0.76235	0.0004	0.008571
Hospitalizations: None vs. Any	Pain Q4	278.534	278.846	0.2034	0.2036	0.3115	0.855773	0.0002	0.008929
Hospitalizations: None vs. Any	Sleep Q2	94.1229	94.2967	0.0718	0.0719	0.1738	0.916769	0.0001	0.009286
Hospitalizations: None vs. Any	Anxiety Q4	215.71	215.83	0.1643	0.1644	0.1196	0.941953	0.0001	0.009643
Hospitalizations: None vs. Any	Anxiety Q1	139.646	139.702	0.1129	0.1129	0.0555	0.972631	0	0.01
Hypertension: Has vs. Does not have	Pain Q3	270.048	275.567	0.2015	0.2052	5.5189	0.0633266	0.0037	0.000357
Hypertension: Has vs. Does not have	Anxiety Q1	138.685	142.44	0.1121	0.115	3.7545	0.15301	0.0029	0.000714
Hypertension: Has vs. Does not have	Depression Q2	296.396	299.495	0.2237	0.2258	3.0985	0.212407	0.0021	0.001071
Hypertension: Has vs. Does not have	Pain Q4	275.17	277.921	0.2012	0.203	2.7505	0.252776	0.0018	0.001429
Hypertension: Has vs. Does not have	Pain Q2	278.885	281.414	0.2019	0.2035	2.5287	0.282423	0.0016	0.001786
Hypertension: Has vs. Does not have	Physical Function Q1	501.409	503.709	0.3258	0.3271	2.2993	0.316748	0.0013	0.002143
Hypertension: Has vs. Does not have	Fatigue Q2	297.623	299.616	0.212	0.2133	1.9933	0.369114	0.0013	0.0025
Hypertension: Has vs. Does not have	Social Q4	373.19	374.779	0.2615	0.2625	1.5885	0.45192	0.001	0.002857
Hypertension: Has vs. Does not have	Fatigue Q4	272.208	273.536	0.1967	0.1975	1.3281	0.514762	0.0008	0.003214
Hypertension: Has vs. Does not have	Physical Function Q2	442.199	443.283	0.2942	0.2948	1.0835	0.581729	0.0006	0.003571
Hypertension: Has vs. Does not have	Anxiety Q2	216.256	217.3	0.1735	0.1742	1.0443	0.593244	0.0007	0.003929
Hypertension: Has vs. Does not have	Depression Q1	191.331	192.324	0.1559	0.1567	0.9926	0.608779	0.0008	0.004286
Hypertension: Has vs. Does not have	Depression Q4	244.121	245.1	0.1998	0.2006	0.9789	0.612963	0.0008	0.004643
Hypertension: Has vs. Does not have	Depression Q3	269.007	269.955	0.2025	0.2032	0.9479	0.622538	0.0007	0.005
Hypertension: Has vs. Does not have	Fatigue Q1	268.87	269.811	0.1928	0.1934	0.9404	0.624877	0.0006	0.005357
Hypertension: Has vs. Does not have	Pain Q1	259.711	260.554	0.1874	0.188	0.8433	0.655964	0.0006	0.005714
Hypertension: Has vs. Does not have	Physical Function Q3	420.294	421.108	0.2841	0.2845	0.8141	0.665611	0.0004	0.006071
Hypertension: Has vs. Does not have	Fatigue Q3	264.024	264.742	0.1909	0.1914	0.7171	0.698689	0.0005	0.006429
Hypertension: Has vs. Does not have	Social Q2	347.307	347.925	0.2436	0.244	0.6176	0.734328	0.0004	0.006786
Hypertension: Has vs. Does not have	Sleep Q2	95.9298	96.4956	0.0731	0.0736	0.5658	0.753595	0.0005	0.007143
Hypertension: Has vs. Does not have	Anxiety Q4	215.881	216.417	0.1645	0.1648	0.5359	0.764946	0.0003	0.0075
Hypertension: Has vs. Does not have	Anxiety Q3	234.99	235.493	0.1862	0.1866	0.5025	0.777828	0.0004	0.007857
Hypertension: Has vs. Does not have	Social Q3	358.778	359.26	0.2506	0.2509	0.4824	0.785684	0.0003	0.008214
Hypertension: Has vs. Does not have	Sleep Q3	103.833	104.186	0.0798	0.08	0.3526	0.838366	0.0002	0.008571
Hypertension: Has vs. Does not have	Social Q1	301.302	301.582	0.2158	0.2159	0.2798	0.869445	0.0001	0.008929
Hypertension: Has vs. Does not have	Sleep Q4	68.8712	68.9913	0.0549	0.055	0.1201	0.941717	0.0001	0.009286
Hypertension: Has vs. Does not have	Physical Function Q4	556.263	556.355	0.3613	0.3613	0.0913	0.955376	0	0.009643
Hypertension: Has vs. Does not have	Sleep Q1	84.4738	84.5333	0.0649	0.0649	0.0595	0.970688	0	0.01
Inflammatory Bowel Disorder: Has vs. Does not have	Fatigue Q2	294.111	299.614	0.2098	0.2133	5.5027	0.0638416	0.0035	0.000357
Inflammatory Bowel Disorder: Has vs. Does not have	Sleep Q3	102.333	107.172	0.0787	0.0822	4.8387	0.0889794	0.0035	0.000714
Inflammatory Bowel Disorder: Has vs. Does not have	Sleep Q1	83.6177	87.9733	0.0643	0.0675	4.3556	0.11329	0.0032	0.001071
Inflammatory Bowel Disorder: Has vs. Does not have	Pain Q2	282.779	287.105	0.2044	0.2072	4.3261	0.114974	0.0028	0.001429
Inflammatory Bowel Disorder: Has vs. Does not have	Anxiety Q2	217.029	221.118	0.174	0.1771	4.0893	0.129425	0.0031	0.001786
Inflammatory Bowel Disorder: Has vs. Does not have	Pain Q3	275.642	278.872	0.2053	0.2075	3.2301	0.198881	0.0022	0.002143
Inflammatory Bowel Disorder: Has vs. Does not have	Pain Q1	262.598	265.136	0.1893	0.191	2.5379	0.281127	0.0017	0.0025
Inflammatory Bowel Disorder: Has vs. Does not have	Sleep Q4	68.2915	70.8184	0.0545	0.0565	2.5269	0.282677	0.002	0.002857
Inflammatory Bowel Disorder: Has vs. Does not have	Fatigue Q3	262.947	265.243	0.1902	0.1917	2.2954	0.317366	0.0015	0.003214
Inflammatory Bowel Disorder: Has vs. Does not have	Fatigue Q1	267.263	269.338	0.1918	0.1931	2.0755	0.354251	0.0013	0.003571
Inflammatory Bowel Disorder: Has vs. Does not have	Physical Function Q2	447.164	448.787	0.297	0.2979	1.6233	0.444125	0.0009	0.003929
Inflammatory Bowel Disorder: Has vs. Does not have	Anxiety Q4	216.214	217.737	0.1647	0.1658	1.5229	0.466989	0.0011	0.004286
Inflammatory Bowel Disorder: Has vs. Does not have	Social Q3	357.93	359.372	0.2501	0.251	1.442	0.486266	0.0009	0.004643
Inflammatory Bowel Disorder: Has vs. Does not have	Fatigue Q4	270.652	271.92	0.1956	0.1965	1.2677	0.530545	0.0009	0.005
Inflammatory Bowel Disorder: Has vs. Does not have	Anxiety Q3	234.058	235.023	0.1855	0.1862	0.9654	0.617115	0.0007	0.005357
Inflammatory Bowel Disorder: Has vs. Does not have	Depression Q4	243.749	244.709	0.1995	0.2003	0.9604	0.61866	0.0008	0.005714
Inflammatory Bowel Disorder: Has vs. Does not have	Sleep Q2	96.0998	97.0217	0.0733	0.0739	0.9219	0.630684	0.0006	0.006071
Inflammatory Bowel Disorder: Has vs. Does not have	Physical Function Q3	422.428	423.303	0.2853	0.2858	0.8749	0.645681	0.0005	0.006429
Inflammatory Bowel Disorder: Has vs. Does not have	Physical Function Q4	559.184	560.024	0.3628	0.3632	0.8399	0.65708	0.0004	0.006786
Inflammatory Bowel Disorder: Has vs. Does not have	Depression Q3	268.457	269.211	0.2021	0.2026	0.7542	0.685847	0.0005	0.007143
Inflammatory Bowel Disorder: Has vs. Does not have	Pain Q4	278.907	279.587	0.2036	0.2041	0.6797	0.711877	0.0005	0.0075
Inflammatory Bowel Disorder: Has vs. Does not have	Social Q2	347.621	348.147	0.2438	0.2441	0.5252	0.769049	0.0003	0.007857
Inflammatory Bowel Disorder: Has vs. Does not have	Social Q4	373.287	373.79	0.2616	0.2619	0.5034	0.777478	0.0003	0.008214
Inflammatory Bowel Disorder: Has vs. Does not have	Social Q1	301.472	301.965	0.2159	0.2162	0.4926	0.781688	0.0003	0.008571
Inflammatory Bowel Disorder: Has vs. Does not have	Depression Q1	191.111	191.476	0.1558	0.156	0.3645	0.833393	0.0002	0.008929
Inflammatory Bowel Disorder: Has vs. Does not have	Depression Q2	297.187	297.424	0.2242	0.2244	0.237	0.888252	0.0002	0.009286
Inflammatory Bowel Disorder: Has vs. Does not have	Physical Function Q1	501.849	502.068	0.3261	0.3262	0.2185	0.896506	0.0001	0.009643
Inflammatory Bowel Disorder: Has vs. Does not have	Anxiety Q1	138.846	138.897	0.1122	0.1123	0.0511	0.974774	0.0001	0.01
Ischemic Heart Disease: Has vs. Does not have	Pain Q3	267.321	280.633	0.1997	0.2086	13.3122	0.00128615	0.0089	0.000357
Ischemic Heart Disease: Has vs. Does not have	Pain Q1	255.143	267.635	0.1845	0.1926	12.492	0.00193819	0.0081	0.000714
Ischemic Heart Disease: Has vs. Does not have	Fatigue Q3	263.348	274.407	0.1904	0.1977	11.0593	0.00396738	0.0073	0.001071
Ischemic Heart Disease: Has vs. Does not have	Pain Q2	278.193	289.095	0.2014	0.2085	10.902	0.00429201	0.0071	0.001429
Ischemic Heart Disease: Has vs. Does not have	Depression Q3	268.445	276.604	0.2021	0.2077	8.1591	0.0169151	0.0056	0.001786
Ischemic Heart Disease: Has vs. Does not have	Depression Q4	244.815	250.81	0.2003	0.2048	5.9956	0.0498967	0.0045	0.002143
Ischemic Heart Disease: Has vs. Does not have	Social Q3	358.345	363.718	0.2504	0.2536	5.3727	0.0681292	0.0032	0.0025
Ischemic Heart Disease: Has vs. Does not have	Sleep Q4	68.7971	74.0346	0.0549	0.059	5.2375	0.0728939	0.0041	0.002857
Ischemic Heart Disease: Has vs. Does not have	Social Q4	371.918	376.578	0.2607	0.2636	4.6607	0.0972617	0.0029	0.003214
Ischemic Heart Disease: Has vs. Does not have	Sleep Q2	95.9876	100.52	0.0732	0.0765	4.5329	0.10368	0.0033	0.003571
Ischemic Heart Disease: Has vs. Does not have	Sleep Q3	103.74	107.987	0.0797	0.0828	4.2465	0.119642	0.0031	0.003929
Ischemic Heart Disease: Has vs. Does not have	Sleep Q1	84.4857	87.8582	0.0649	0.0674	3.3725	0.185213	0.0025	0.004286
Ischemic Heart Disease: Has vs. Does not have	Physical Function Q2	443.07	446.349	0.2947	0.2965	3.2791	0.194067	0.0018	0.004643
Ischemic Heart Disease: Has vs. Does not have	Anxiety Q2	216.182	219.357	0.1734	0.1758	3.1756	0.204375	0.0024	0.005
Ischemic Heart Disease: Has vs. Does not have	Physical Function Q3	419.201	422.275	0.2834	0.2852	3.0738	0.215047	0.0018	0.005357
Ischemic Heart Disease: Has vs. Does not have	Anxiety Q4	216.319	219.153	0.1648	0.1667	2.8339	0.242452	0.0019	0.005714
Ischemic Heart Disease: Has vs. Does not have	Fatigue Q1	268.982	271.737	0.1929	0.1947	2.7544	0.252284	0.0018	0.006071
Ischemic Heart Disease: Has vs. Does not have	Social Q1	300.356	302.699	0.2152	0.2167	2.3428	0.309933	0.0015	0.006429
Ischemic Heart Disease: Has vs. Does not have	Anxiety Q3	234.893	237.154	0.1861	0.1878	2.2611	0.322856	0.0017	0.006786
Ischemic Heart Disease: Has vs. Does not have	Fatigue Q2	297.112	298.952	0.2117	0.2129	1.8401	0.398499	0.0012	0.007143
Ischemic Heart Disease: Has vs. Does not have	Pain Q4	275.052	276.766	0.2011	0.2022	1.7142	0.424391	0.0011	0.0075
Ischemic Heart Disease: Has vs. Does not have	Fatigue Q4	271.392	273.046	0.1961	0.1972	1.6541	0.437338	0.0011	0.007857
Ischemic Heart Disease: Has vs. Does not have	Anxiety Q1	138.924	140.383	0.1123	0.1134	1.4593	0.482078	0.0011	0.008214
Ischemic Heart Disease: Has vs. Does not have	Physical Function Q4	556.623	557.994	0.3614	0.3622	1.3717	0.503662	0.0008	0.008571
Ischemic Heart Disease: Has vs. Does not have	Social Q2	346.308	347.227	0.243	0.2436	0.9192	0.631536	0.0006	0.008929
Ischemic Heart Disease: Has vs. Does not have	Depression Q1	191.431	192.015	0.156	0.1565	0.5835	0.746955	0.0005	0.009286
Ischemic Heart Disease: Has vs. Does not have	Physical Function Q1	502.912	503.263	0.3266	0.3268	0.3506	0.839205	0.0002	0.009643
Ischemic Heart Disease: Has vs. Does not have	Depression Q2	297.345	297.666	0.2243	0.2246	0.3211	0.851675	0.0003	0.01
Number of Chronic Conditions: 2 vs. > 2	Depression Q3	267.958	279.334	0.2018	0.2095	11.3765	0.00338551	0.0077	0.000357
Number of Chronic Conditions: 2 vs. > 2	Depression Q4	245.615	255.337	0.2009	0.2082	9.7218	0.00774351	0.0073	0.000714
Number of Chronic Conditions: 2 vs. > 2	Anxiety Q1	138.996	148.203	0.1124	0.1194	9.2072	0.0100157	0.007	0.001071
Number of Chronic Conditions: 2 vs. > 2	Depression Q2	297.002	303.315	0.2241	0.2284	6.3132	0.0425702	0.0043	0.001429
Number of Chronic Conditions: 2 vs. > 2	Anxiety Q2	216.858	222.725	0.1739	0.1782	5.8663	0.0532291	0.0043	0.001786
Number of Chronic Conditions: 2 vs. > 2	Anxiety Q4	216.218	221.034	0.1647	0.1681	4.8164	0.0899771	0.0034	0.002143
Number of Chronic Conditions: 2 vs. > 2	Pain Q3	274.126	278.542	0.2043	0.2072	4.4157	0.109937	0.0029	0.0025
Number of Chronic Conditions: 2 vs. > 2	Pain Q1	260.972	264.146	0.1883	0.1903	3.1745	0.204487	0.002	0.002857
Number of Chronic Conditions: 2 vs. > 2	Pain Q4	277.271	280.316	0.2026	0.2046	3.0447	0.218199	0.002	0.003214
Number of Chronic Conditions: 2 vs. > 2	Sleep Q4	68.4165	71.0994	0.0546	0.0567	2.6829	0.261466	0.0021	0.003571
Number of Chronic Conditions: 2 vs. > 2	Fatigue Q4	271.294	273.719	0.1961	0.1976	2.4248	0.297482	0.0015	0.003929
Number of Chronic Conditions: 2 vs. > 2	Depression Q1	191.521	193.278	0.1561	0.1574	1.7574	0.415322	0.0013	0.004286
Number of Chronic Conditions: 2 vs. > 2	Fatigue Q3	262.988	264.429	0.1902	0.1912	1.4407	0.486582	0.001	0.004643
Number of Chronic Conditions: 2 vs. > 2	Social Q1	301.838	303.214	0.2161	0.217	1.3756	0.502681	0.0009	0.005
Number of Chronic Conditions: 2 vs. > 2	Physical Function Q3	422.865	424.065	0.2855	0.2862	1.2002	0.548757	0.0007	0.005357
Number of Chronic Conditions: 2 vs. > 2	Fatigue Q2	297.681	298.88	0.2121	0.2128	1.1983	0.549278	0.0007	0.005714
Number of Chronic Conditions: 2 vs. > 2	Anxiety Q3	234.601	235.734	0.1859	0.1868	1.1334	0.567395	0.0009	0.006071
Number of Chronic Conditions: 2 vs. > 2	Physical Function Q2	445.829	446.817	0.2963	0.2968	0.988	0.610181	0.0005	0.006429
Number of Chronic Conditions: 2 vs. > 2	Pain Q2	282.55	283.36	0.2043	0.2048	0.8104	0.666843	0.0005	0.006786
Number of Chronic Conditions: 2 vs. > 2	Social Q4	374.178	374.775	0.2621	0.2625	0.5972	0.741856	0.0004	0.007143
Number of Chronic Conditions: 2 vs. > 2	Social Q3	359.46	359.974	0.251	0.2514	0.514	0.773368	0.0004	0.0075
Number of Chronic Conditions: 2 vs. > 2	Fatigue Q1	269.358	269.819	0.1931	0.1934	0.4611	0.794097	0.0003	0.007857
Number of Chronic Conditions: 2 vs. > 2	Sleep Q2	96.0881	96.5118	0.0733	0.0736	0.4237	0.809086	0.0003	0.008214
Number of Chronic Conditions: 2 vs. > 2	Sleep Q1	83.8017	84.1002	0.0644	0.0646	0.2985	0.861354	0.0002	0.008571
Number of Chronic Conditions: 2 vs. > 2	Sleep Q3	103.012	103.204	0.0792	0.0793	0.1922	0.908373	0.0001	0.008929
Number of Chronic Conditions: 2 vs. > 2	Social Q2	347.494	347.64	0.2437	0.2438	0.1462	0.929508	0.0001	0.009286
Number of Chronic Conditions: 2 vs. > 2	Physical Function Q4	559.916	560.042	0.3632	0.3632	0.126	0.938943	0	0.009643
Number of Chronic Conditions: 2 vs. > 2	Physical Function Q1	501.401	501.522	0.3258	0.3259	0.1208	0.941388	0.0001	0.01
Osteoporosis: Has vs. Does not have	Fatigue Q3	261.741	264.993	0.1894	0.1915	3.2516	0.196754	0.0021	0.000357
Osteoporosis: Has vs. Does not have	Physical Function Q2	446.117	448.852	0.2964	0.2979	2.7349	0.254756	0.0015	0.000714
Osteoporosis: Has vs. Does not have	Sleep Q4	68.1698	70.8892	0.0544	0.0565	2.7194	0.256738	0.0021	0.001071
Osteoporosis: Has vs. Does not have	Pain Q2	281.846	284.484	0.2038	0.2055	2.6379	0.267416	0.0017	0.001429
Osteoporosis: Has vs. Does not have	Sleep Q3	103.179	105.412	0.0793	0.0809	2.2333	0.327375	0.0016	0.001786
Osteoporosis: Has vs. Does not have	Pain Q3	274.452	276.576	0.2045	0.2059	2.1237	0.345815	0.0014	0.002143
Osteoporosis: Has vs. Does not have	Anxiety Q2	216.119	218.118	0.1734	0.1748	1.9984	0.368174	0.0014	0.0025
Osteoporosis: Has vs. Does not have	Fatigue Q4	272.497	274.415	0.1968	0.1981	1.9175	0.383372	0.0013	0.002857
Osteoporosis: Has vs. Does not have	Pain Q4	278.428	280.186	0.2033	0.2045	1.7577	0.41526	0.0012	0.003214
Osteoporosis: Has vs. Does not have	Social Q4	374.173	375.773	0.2621	0.2631	1.5998	0.449374	0.001	0.003571
Osteoporosis: Has vs. Does not have	Anxiety Q3	234.805	236.192	0.1861	0.1871	1.3862	0.500024	0.001	0.003929
Osteoporosis: Has vs. Does not have	Pain Q1	260.518	261.757	0.188	0.1888	1.2389	0.53824	0.0008	0.004286
Osteoporosis: Has vs. Does not have	Social Q2	348.802	349.958	0.2445	0.2452	1.1567	0.560823	0.0007	0.004643
Osteoporosis: Has vs. Does not have	Social Q3	358.983	360.067	0.2508	0.2514	1.0841	0.581555	0.0006	0.005
Osteoporosis: Has vs. Does not have	Social Q1	301.443	302.436	0.2159	0.2165	0.9929	0.608688	0.0006	0.005357
Osteoporosis: Has vs. Does not have	Sleep Q2	96.5844	97.5196	0.0736	0.0743	0.9352	0.626504	0.0007	0.005714
Osteoporosis: Has vs. Does not have	Fatigue Q2	299.437	300.266	0.2132	0.2137	0.8285	0.660836	0.0005	0.006071
Osteoporosis: Has vs. Does not have	Depression Q2	297.329	297.955	0.2243	0.2247	0.6261	0.731213	0.0004	0.006429
Osteoporosis: Has vs. Does not have	Sleep Q1	83.9316	84.4145	0.0645	0.0649	0.4829	0.785488	0.0004	0.006786
Osteoporosis: Has vs. Does not have	Physical Function Q4	557.785	558.189	0.3621	0.3623	0.4047	0.816809	0.0002	0.007143
Osteoporosis: Has vs. Does not have	Anxiety Q4	215.831	216.209	0.1644	0.1647	0.3786	0.827538	0.0003	0.0075
Osteoporosis: Has vs. Does not have	Depression Q4	244.277	244.631	0.1999	0.2002	0.3542	0.837696	0.0003	0.007857
Osteoporosis: Has vs. Does not have	Fatigue Q1	267.711	268.059	0.1921	0.1923	0.3479	0.840339	0.0002	0.008214
Osteoporosis: Has vs. Does not have	Anxiety Q1	138.874	139.084	0.1123	0.1124	0.2101	0.90028	0.0001	0.008571
Osteoporosis: Has vs. Does not have	Depression Q3	268.151	268.321	0.2019	0.202	0.1697	0.91865	0.0001	0.008929
Osteoporosis: Has vs. Does not have	Depression Q1	191.735	191.831	0.1562	0.1563	0.0962	0.953038	0.0001	0.009286
Osteoporosis: Has vs. Does not have	Physical Function Q1	502.715	502.737	0.3265	0.3265	0.0218	0.989159	0	0.009643
Osteoporosis: Has vs. Does not have	Physical Function Q3	421.875	421.888	0.285	0.285	0.0136	0.993223	0	0.01
Other Heart Problems: Has vs. Does not have	Anxiety Q1	139.125	147.615	0.1125	0.119	8.4897	0.0143379	0.0065	0.000357
Other Heart Problems: Has vs. Does not have	Pain Q3	275.901	281.346	0.2055	0.2091	5.4444	0.06573	0.0036	0.000714
Other Heart Problems: Has vs. Does not have	Depression Q3	268.331	273.555	0.2021	0.2056	5.224	0.0733876	0.0035	0.001071
Other Heart Problems: Has vs. Does not have	Depression Q4	244.47	248.261	0.2001	0.2029	3.7916	0.150198	0.0028	0.001429
Other Heart Problems: Has vs. Does not have	Sleep Q4	69.3084	72.5725	0.0553	0.0578	3.2641	0.195528	0.0025	0.001786
Other Heart Problems: Has vs. Does not have	Fatigue Q1	268.78	271.707	0.1928	0.1947	2.9272	0.231402	0.0019	0.002143
Other Heart Problems: Has vs. Does not have	Sleep Q2	95.0391	97.8998	0.0725	0.0746	2.8607	0.239225	0.0021	0.0025
Other Heart Problems: Has vs. Does not have	Physical Function Q3	422.394	425.241	0.2853	0.2869	2.8468	0.240894	0.0016	0.002857
Other Heart Problems: Has vs. Does not have	Fatigue Q2	296.239	298.927	0.2112	0.2129	2.6881	0.260787	0.0017	0.003214
Other Heart Problems: Has vs. Does not have	Sleep Q3	103.346	105.756	0.0794	0.0812	2.4104	0.299632	0.0018	0.003571
Other Heart Problems: Has vs. Does not have	Sleep Q1	83.0687	85.2403	0.0639	0.0655	2.1716	0.337632	0.0016	0.003929
Other Heart Problems: Has vs. Does not have	Fatigue Q3	264.981	267.131	0.1915	0.1929	2.1492	0.341434	0.0014	0.004286
Other Heart Problems: Has vs. Does not have	Social Q3	358.864	360.916	0.2507	0.2519	2.0517	0.358492	0.0012	0.004643
Other Heart Problems: Has vs. Does not have	Anxiety Q2	218.044	219.981	0.1748	0.1762	1.9374	0.379576	0.0014	0.005
Other Heart Problems: Has vs. Does not have	Pain Q2	283.471	285.211	0.2049	0.206	1.7401	0.418931	0.0011	0.005357
Other Heart Problems: Has vs. Does not have	Pain Q4	278.039	279.698	0.2031	0.2041	1.6591	0.436246	0.001	0.005714
Other Heart Problems: Has vs. Does not have	Anxiety Q3	234.134	235.452	0.1856	0.1865	1.3177	0.517446	0.0009	0.006071
Other Heart Problems: Has vs. Does not have	Physical Function Q1	501.669	502.589	0.326	0.3265	0.9203	0.631189	0.0005	0.006429
Other Heart Problems: Has vs. Does not have	Social Q4	373.844	374.73	0.2619	0.2624	0.8852	0.642364	0.0005	0.006786
Other Heart Problems: Has vs. Does not have	Social Q1	301.459	302.304	0.2159	0.2164	0.8443	0.655636	0.0005	0.007143
Other Heart Problems: Has vs. Does not have	Anxiety Q4	215.801	216.596	0.1644	0.165	0.7952	0.671931	0.0006	0.0075
Other Heart Problems: Has vs. Does not have	Depression Q1	191.714	192.447	0.1562	0.1568	0.733	0.693156	0.0006	0.007857
Other Heart Problems: Has vs. Does not have	Physical Function Q4	561.205	561.909	0.3638	0.3642	0.7046	0.703069	0.0004	0.008214
Other Heart Problems: Has vs. Does not have	Pain Q1	262.363	263.045	0.1892	0.1896	0.6825	0.710881	0.0004	0.008571
Other Heart Problems: Has vs. Does not have	Depression Q2	296.929	297.595	0.2241	0.2245	0.6662	0.716699	0.0004	0.008929
Other Heart Problems: Has vs. Does not have	Fatigue Q4	272.016	272.64	0.1965	0.1969	0.6238	0.732055	0.0004	0.009286
Other Heart Problems: Has vs. Does not have	Social Q2	348.016	348.359	0.2441	0.2443	0.3428	0.842485	0.0002	0.009643
Other Heart Problems: Has vs. Does not have	Physical Function Q2	447.884	448.079	0.2974	0.2975	0.1949	0.907148	0.0001	0.01
Percent Poverty: <=9.99% vs >9.99%	Depression Q2	287.818	298.988	0.2179	0.2254	11.1692	0.00375525	0.0075	0.000357
Percent Poverty: <=9.99% vs >9.99%	Physical Function Q4	554.963	564.344	0.3606	0.3655	9.3811	0.00918163	0.0049	0.000714
Percent Poverty: <=9.99% vs >9.99%	Social Q3	355.519	364.289	0.2486	0.254	8.7694	0.0124666	0.0054	0.001071
Percent Poverty: <=9.99% vs >9.99%	Social Q4	371.417	378.722	0.2604	0.2648	7.3048	0.0259288	0.0044	0.001429
Percent Poverty: <=9.99% vs >9.99%	Fatigue Q4	269.372	275.414	0.1948	0.1987	6.0417	0.0487598	0.0039	0.001786
Percent Poverty: <=9.99% vs >9.99%	Fatigue Q3	259.479	265.282	0.1879	0.1917	5.8028	0.0549462	0.0038	0.002143
Percent Poverty: <=9.99% vs >9.99%	Physical Function Q2	442.195	447.328	0.2942	0.2971	5.1327	0.0768154	0.0029	0.0025
Percent Poverty: <=9.99% vs >9.99%	Pain Q3	277.825	282.715	0.2068	0.21	4.8903	0.0867131	0.0032	0.002857
Percent Poverty: <=9.99% vs >9.99%	Depression Q1	187.935	192.787	0.1534	0.157	4.8528	0.0883543	0.0036	0.003214
Percent Poverty: <=9.99% vs >9.99%	Fatigue Q1	265.137	269.227	0.1904	0.1931	4.0905	0.129348	0.0027	0.003571
Percent Poverty: <=9.99% vs >9.99%	Depression Q4	240.996	245.028	0.1975	0.2005	4.0326	0.133147	0.003	0.003929
Percent Poverty: <=9.99% vs >9.99%	Fatigue Q2	296.526	300.133	0.2113	0.2136	3.6076	0.164672	0.0023	0.004286
Percent Poverty: <=9.99% vs >9.99%	Anxiety Q4	212.768	215.959	0.1623	0.1645	3.192	0.202706	0.0022	0.004643
Percent Poverty: <=9.99% vs >9.99%	Anxiety Q3	232.957	235.837	0.1847	0.1868	2.8794	0.236999	0.0021	0.005
Percent Poverty: <=9.99% vs >9.99%	Social Q2	348.828	351.46	0.2446	0.2462	2.6321	0.268193	0.0016	0.005357
Percent Poverty: <=9.99% vs >9.99%	Physical Function Q3	420.337	422.838	0.2841	0.2855	2.5006	0.286419	0.0014	0.005714
Percent Poverty: <=9.99% vs >9.99%	Social Q1	301.825	303.431	0.2161	0.2171	1.6061	0.447961	0.001	0.006071
Percent Poverty: <=9.99% vs >9.99%	Anxiety Q2	216.158	217.637	0.1734	0.1745	1.4788	0.4774	0.0011	0.006429
Percent Poverty: <=9.99% vs >9.99%	Sleep Q4	68.8653	69.8206	0.0549	0.0557	0.9553	0.620239	0.0008	0.006786
Percent Poverty: <=9.99% vs >9.99%	Depression Q3	268.958	269.828	0.2025	0.2031	0.8695	0.647427	0.0006	0.007143
Percent Poverty: <=9.99% vs >9.99%	Pain Q4	276.749	277.578	0.2022	0.2028	0.8289	0.660704	0.0006	0.0075
Percent Poverty: <=9.99% vs >9.99%	Sleep Q3	103.093	103.824	0.0792	0.0798	0.7304	0.694058	0.0006	0.007857
Percent Poverty: <=9.99% vs >9.99%	Physical Function Q1	502.353	502.789	0.3263	0.3266	0.4367	0.803844	0.0003	0.008214
Percent Poverty: <=9.99% vs >9.99%	Sleep Q2	94.8386	95.19	0.0723	0.0726	0.3514	0.83887	0.0003	0.008571
Percent Poverty: <=9.99% vs >9.99%	Sleep Q1	84.9515	85.2878	0.0653	0.0655	0.3363	0.845227	0.0002	0.008929
Percent Poverty: <=9.99% vs >9.99%	Pain Q2	284.641	284.862	0.2056	0.2058	0.2211	0.895342	0.0002	0.009286
Percent Poverty: <=9.99% vs >9.99%	Pain Q1	262.083	262.204	0.189	0.1891	0.1216	0.941011	0.0001	0.009643
Percent Poverty: <=9.99% vs >9.99%	Anxiety Q1	139.31	139.359	0.1126	0.1126	0.0489	0.975846	0	0.01
Primary Care Visits: 0-3 vs. > 3	Physical Function Q4	551.457	572.733	0.3587	0.3698	21.2759	2.39882e-05	0.0111	0.000357
Primary Care Visits: 0-3 vs. > 3	Pain Q4	259.772	272.052	0.191	0.1991	12.2808	0.00215406	0.0081	0.000714
Primary Care Visits: 0-3 vs. > 3	Pain Q3	266.313	276.194	0.199	0.2057	9.8815	0.00714923	0.0067	0.001071
Primary Care Visits: 0-3 vs. > 3	Social Q2	347.178	356.43	0.2435	0.2492	9.2518	0.00979484	0.0057	0.001429
Primary Care Visits: 0-3 vs. > 3	Fatigue Q4	266.44	275.677	0.1929	0.1989	9.2374	0.00986561	0.006	0.001786
Primary Care Visits: 0-3 vs. > 3	Social Q3	353.802	361.593	0.2476	0.2523	7.7913	0.0203302	0.0047	0.002143
Primary Care Visits: 0-3 vs. > 3	Physical Function Q3	418.39	425.429	0.283	0.287	7.0386	0.0296202	0.004	0.0025
Primary Care Visits: 0-3 vs. > 3	Social Q1	300.367	306.777	0.2152	0.2192	6.4093	0.0405731	0.004	0.002857
Primary Care Visits: 0-3 vs. > 3	Physical Function Q2	442.109	448.395	0.2942	0.2977	6.2859	0.0431553	0.0035	0.003214
Primary Care Visits: 0-3 vs. > 3	Physical Function Q1	493.337	499.566	0.3215	0.3249	6.229	0.0444007	0.0034	0.003571
Primary Care Visits: 0-3 vs. > 3	Fatigue Q2	293.768	299.47	0.2096	0.2132	5.7019	0.0577894	0.0036	0.003929
Primary Care Visits: 0-3 vs. > 3	Pain Q2	272.397	277.466	0.1977	0.201	5.0685	0.0793212	0.0033	0.004286
Primary Care Visits: 0-3 vs. > 3	Pain Q1	250.482	255.232	0.1814	0.1845	4.75	0.0930145	0.0031	0.004643
Primary Care Visits: 0-3 vs. > 3	Fatigue Q3	262.302	265.948	0.1898	0.1921	3.646	0.16154	0.0023	0.005
Primary Care Visits: 0-3 vs. > 3	Social Q4	369.243	372.536	0.2591	0.2611	3.2922	0.1928	0.002	0.005357
Primary Care Visits: 0-3 vs. > 3	Fatigue Q1	256.55	259.295	0.1848	0.1866	2.7457	0.253384	0.0018	0.005714
Primary Care Visits: 0-3 vs. > 3	Sleep Q2	93.3347	95.3533	0.0712	0.0727	2.0186	0.364474	0.0015	0.006071
Primary Care Visits: 0-3 vs. > 3	Anxiety Q4	211.471	213.443	0.1614	0.1627	1.9725	0.372973	0.0013	0.006429
Primary Care Visits: 0-3 vs. > 3	Sleep Q4	66.9445	68.8249	0.0534	0.0549	1.8804	0.39055	0.0015	0.006786
Primary Care Visits: 0-3 vs. > 3	Anxiety Q3	231.603	232.965	0.1838	0.1847	1.3616	0.506212	0.0009	0.007143
Primary Care Visits: 0-3 vs. > 3	Depression Q2	287.433	288.705	0.2176	0.2185	1.2725	0.529273	0.0009	0.0075
Primary Care Visits: 0-3 vs. > 3	Anxiety Q2	219.143	220.281	0.1756	0.1764	1.1376	0.566204	0.0008	0.007857
Primary Care Visits: 0-3 vs. > 3	Sleep Q3	103.574	104.615	0.0796	0.0803	1.0414	0.594105	0.0007	0.008214
Primary Care Visits: 0-3 vs. > 3	Anxiety Q1	136.518	137.216	0.1105	0.111	0.698	0.705393	0.0005	0.008571
Primary Care Visits: 0-3 vs. > 3	Depression Q4	239.26	239.907	0.1962	0.1967	0.6469	0.723648	0.0005	0.008929
Primary Care Visits: 0-3 vs. > 3	Sleep Q1	83.3634	83.9605	0.0641	0.0645	0.5971	0.741893	0.0004	0.009286
Primary Care Visits: 0-3 vs. > 3	Depression Q1	185.435	185.891	0.1515	0.1518	0.4563	0.796005	0.0003	0.009643
Primary Care Visits: 0-3 vs. > 3	Depression Q3	263.651	263.668	0.1989	0.1989	0.0174	0.991338	0	0.01
Race/Ethnicity: White/Non-Hispanic vs. All Other	Depression Q4	233.612	249.217	0.192	0.2036	15.6045	0.000408814	0.0116	0.000357
Race/Ethnicity: White/Non-Hispanic vs. All Other	Anxiety Q2	212.941	225.415	0.171	0.1802	12.4736	0.00195611	0.0092	0.000714
Race/Ethnicity: White/Non-Hispanic vs. All Other	Sleep Q4	61.5471	72.6242	0.0492	0.0579	11.0771	0.00393222	0.0087	0.001071
Race/Ethnicity: White/Non-Hispanic vs. All Other	Pain Q3	267.894	276.675	0.2001	0.206	8.7809	0.0123952	0.0059	0.001429
Race/Ethnicity: White/Non-Hispanic vs. All Other	Anxiety Q4	209.625	217.858	0.1601	0.1658	8.2326	0.0163047	0.0057	0.001786
Race/Ethnicity: White/Non-Hispanic vs. All Other	Sleep Q1	79.4725	87.3548	0.0612	0.067	7.8823	0.0194259	0.0058	0.002143
Race/Ethnicity: White/Non-Hispanic vs. All Other	Anxiety Q1	133.87	141.405	0.1084	0.1142	7.5358	0.0231005	0.0058	0.0025
Race/Ethnicity: White/Non-Hispanic vs. All Other	Pain Q4	269.344	276.611	0.1973	0.2021	7.2677	0.0264143	0.0048	0.002857
Race/Ethnicity: White/Non-Hispanic vs. All Other	Depression Q3	262.844	269.787	0.1983	0.203	6.9438	0.031058	0.0047	0.003214
Race/Ethnicity: White/Non-Hispanic vs. All Other	Pain Q1	259.206	265.497	0.1871	0.1912	6.2907	0.0430519	0.0041	0.003571
Race/Ethnicity: White/Non-Hispanic vs. All Other	Social Q1	298.08	303.946	0.2137	0.2174	5.8659	0.0532397	0.0037	0.003929
Race/Ethnicity: White/Non-Hispanic vs. All Other	Sleep Q2	93.8213	98.548	0.0716	0.0751	4.7267	0.0941044	0.0035	0.004286
Race/Ethnicity: White/Non-Hispanic vs. All Other	Anxiety Q3	230.337	234.776	0.1828	0.1861	4.4384	0.108696	0.0033	0.004643
Race/Ethnicity: White/Non-Hispanic vs. All Other	Pain Q2	281.347	285.772	0.2035	0.2063	4.4254	0.109405	0.0028	0.005
Race/Ethnicity: White/Non-Hispanic vs. All Other	Depression Q2	293.324	297.625	0.2216	0.2245	4.3012	0.116414	0.0029	0.005357
Race/Ethnicity: White/Non-Hispanic vs. All Other	Sleep Q3	102.508	106.487	0.0788	0.0817	3.9785	0.136798	0.0029	0.005714
Race/Ethnicity: White/Non-Hispanic vs. All Other	Depression Q1	186.796	189.985	0.1525	0.1549	3.1891	0.203	0.0024	0.006071
Race/Ethnicity: White/Non-Hispanic vs. All Other	Fatigue Q1	262.104	264.273	0.1884	0.1898	2.1688	0.338105	0.0014	0.006429
Race/Ethnicity: White/Non-Hispanic vs. All Other	Physical Function Q3	420.039	422.126	0.2839	0.2851	2.0864	0.352325	0.0012	0.006786
Race/Ethnicity: White/Non-Hispanic vs. All Other	Fatigue Q2	296.694	298.606	0.2115	0.2127	1.9129	0.384255	0.0012	0.007143
Race/Ethnicity: White/Non-Hispanic vs. All Other	Physical Function Q4	553.053	554.702	0.3596	0.3604	1.649	0.438454	0.0008	0.0075
Race/Ethnicity: White/Non-Hispanic vs. All Other	Fatigue Q4	270.702	272.314	0.1957	0.1967	1.6115	0.446753	0.001	0.007857
Race/Ethnicity: White/Non-Hispanic vs. All Other	Fatigue Q3	260.327	261.438	0.1885	0.1892	1.1114	0.573671	0.0007	0.008214
Race/Ethnicity: White/Non-Hispanic vs. All Other	Social Q4	371.802	372.796	0.2607	0.2613	0.9933	0.608566	0.0006	0.008571
Race/Ethnicity: White/Non-Hispanic vs. All Other	Social Q2	341.264	342.215	0.2399	0.2405	0.9513	0.621481	0.0006	0.008929
Race/Ethnicity: White/Non-Hispanic vs. All Other	Physical Function Q1	500.328	501.157	0.3253	0.3257	0.8287	0.66077	0.0004	0.009286
Race/Ethnicity: White/Non-Hispanic vs. All Other	Social Q3	356.445	357.181	0.2492	0.2497	0.7363	0.692013	0.0005	0.009643
Race/Ethnicity: White/Non-Hispanic vs. All Other	Physical Function Q2	444.831	445.253	0.2957	0.2959	0.4217	0.809896	0.0002	0.01
Sciatica: Has vs. Does not have	Pain Q2	261.736	283.858	0.1907	0.2051	22.1222	1.57118e-05	0.0144	0.000357
Sciatica: Has vs. Does not have	Pain Q1	243.389	263.425	0.1767	0.1899	20.0362	4.45856e-05	0.0132	0.000714
Sciatica: Has vs. Does not have	Pain Q4	266.447	277.453	0.1954	0.2027	11.0062	0.00407412	0.0073	0.001071
Sciatica: Has vs. Does not have	Sleep Q2	89.6656	98.1361	0.0685	0.0748	8.4705	0.0144762	0.0063	0.001429
Sciatica: Has vs. Does not have	Physical Function Q1	497.365	503.685	0.3237	0.3271	6.3199	0.0424279	0.0034	0.001786
Sciatica: Has vs. Does not have	Pain Q3	266.926	272.226	0.1994	0.203	5.3	0.0706512	0.0036	0.002143
Sciatica: Has vs. Does not have	Physical Function Q2	438.786	443.268	0.2923	0.2948	4.4815	0.106379	0.0025	0.0025
Sciatica: Has vs. Does not have	Social Q3	352.563	356.993	0.2468	0.2495	4.4293	0.109192	0.0027	0.002857
Sciatica: Has vs. Does not have	Sleep Q3	99.5819	102.599	0.0766	0.0789	3.0175	0.221186	0.0023	0.003214
Sciatica: Has vs. Does not have	Sleep Q1	81.1824	83.898	0.0624	0.0645	2.7156	0.257226	0.0021	0.003571
Sciatica: Has vs. Does not have	Anxiety Q1	137.429	140.119	0.1112	0.1132	2.6907	0.260449	0.002	0.003929
Sciatica: Has vs. Does not have	Physical Function Q4	552.251	554.683	0.3592	0.3604	2.4319	0.296428	0.0012	0.004286
Sciatica: Has vs. Does not have	Social Q4	370.427	372.62	0.2598	0.2612	2.193	0.334038	0.0014	0.004643
Sciatica: Has vs. Does not have	Anxiety Q2	214.638	216.766	0.1723	0.1738	2.1282	0.345038	0.0015	0.005
Sciatica: Has vs. Does not have	Physical Function Q3	420.83	422.897	0.2844	0.2856	2.0672	0.355724	0.0012	0.005357
Sciatica: Has vs. Does not have	Depression Q3	267.902	269.948	0.2018	0.2032	2.0462	0.359479	0.0014	0.005714
Sciatica: Has vs. Does not have	Fatigue Q2	298.084	300.123	0.2123	0.2136	2.0389	0.360793	0.0013	0.006071
Sciatica: Has vs. Does not have	Social Q1	299.625	301.505	0.2147	0.2159	1.8793	0.390765	0.0012	0.006429
Sciatica: Has vs. Does not have	Social Q2	343.663	345.308	0.2414	0.2424	1.645	0.439332	0.001	0.006786
Sciatica: Has vs. Does not have	Anxiety Q3	233.565	235.191	0.1852	0.1864	1.6252	0.443703	0.0012	0.007143
Sciatica: Has vs. Does not have	Fatigue Q4	271.447	272.901	0.1962	0.1971	1.4534	0.483502	0.0009	0.0075
Sciatica: Has vs. Does not have	Fatigue Q1	268.114	269.375	0.1923	0.1932	1.2616	0.532166	0.0009	0.007857
Sciatica: Has vs. Does not have	Depression Q2	296.622	297.639	0.2239	0.2245	1.017	0.601397	0.0006	0.008214
Sciatica: Has vs. Does not have	Anxiety Q4	216.46	217.115	0.1649	0.1653	0.6555	0.720543	0.0004	0.008571
Sciatica: Has vs. Does not have	Depression Q4	244.898	245.329	0.2004	0.2007	0.4319	0.805776	0.0003	0.008929
Sciatica: Has vs. Does not have	Depression Q1	192.292	192.607	0.1567	0.1569	0.315	0.854277	0.0002	0.009286
Sciatica: Has vs. Does not have	Sleep Q4	69.7117	69.7467	0.0556	0.0556	0.035	0.982652	0	0.009643
Sciatica: Has vs. Does not have	Fatigue Q3	263.807	263.837	0.1907	0.1908	0.0306	0.984816	0.0001	0.01
Specialty Care Visits: 0-3 vs. > 3	Pain Q4	271.307	281.502	0.1986	0.2053	10.1945	0.00611354	0.0067	0.000357
Specialty Care Visits: 0-3 vs. > 3	Pain Q3	274.585	284.428	0.2046	0.2112	9.8433	0.0072871	0.0066	0.000714
Specialty Care Visits: 0-3 vs. > 3	Anxiety Q4	213.344	222.402	0.1627	0.169	9.0577	0.0107931	0.0063	0.001071
Specialty Care Visits: 0-3 vs. > 3	Pain Q2	276.769	285.645	0.2005	0.2063	8.8762	0.0118184	0.0058	0.001429
Specialty Care Visits: 0-3 vs. > 3	Pain Q1	254.761	262.795	0.1842	0.1895	8.0345	0.0180024	0.0053	0.001786
Specialty Care Visits: 0-3 vs. > 3	Physical Function Q1	495.994	502.906	0.3229	0.3266	6.912	0.0315557	0.0037	0.002143
Specialty Care Visits: 0-3 vs. > 3	Physical Function Q4	558.542	564.988	0.3625	0.3658	6.4463	0.0398294	0.0033	0.0025
Specialty Care Visits: 0-3 vs. > 3	Depression Q1	187.33	193.309	0.1529	0.1574	5.9796	0.0502975	0.0045	0.002857
Specialty Care Visits: 0-3 vs. > 3	Depression Q3	263.507	269.433	0.1988	0.2028	5.9266	0.0516482	0.004	0.003214
Specialty Care Visits: 0-3 vs. > 3	Depression Q2	293.484	299.369	0.2217	0.2257	5.8855	0.0527205	0.004	0.003571
Specialty Care Visits: 0-3 vs. > 3	Anxiety Q1	137.831	142.613	0.1115	0.1151	4.7815	0.091561	0.0036	0.003929
Specialty Care Visits: 0-3 vs. > 3	Social Q3	357.245	362.019	0.2497	0.2526	4.7745	0.091882	0.0029	0.004286
Specialty Care Visits: 0-3 vs. > 3	Physical Function Q2	443.187	447.929	0.2948	0.2974	4.7421	0.0933826	0.0026	0.004643
Specialty Care Visits: 0-3 vs. > 3	Social Q4	370.767	374.272	0.26	0.2622	3.5048	0.173357	0.0022	0.005
Specialty Care Visits: 0-3 vs. > 3	Social Q1	295.683	299.111	0.2122	0.2144	3.428	0.180144	0.0022	0.005357
Specialty Care Visits: 0-3 vs. > 3	Anxiety Q3	236.79	240.147	0.1875	0.1899	3.3563	0.186719	0.0024	0.005714
Specialty Care Visits: 0-3 vs. > 3	Depression Q4	240.013	243.158	0.1968	0.1991	3.1451	0.207515	0.0023	0.006071
Specialty Care Visits: 0-3 vs. > 3	Anxiety Q2	213.881	217.017	0.1717	0.174	3.1358	0.208483	0.0023	0.006429
Specialty Care Visits: 0-3 vs. > 3	Sleep Q2	95.612	98.4201	0.0729	0.075	2.8081	0.2456	0.0021	0.006786
Specialty Care Visits: 0-3 vs. > 3	Sleep Q3	98.8218	101.454	0.0761	0.078	2.6326	0.268126	0.0019	0.007143
Specialty Care Visits: 0-3 vs. > 3	Fatigue Q1	265.419	267.678	0.1906	0.1921	2.2587	0.323243	0.0015	0.0075
Specialty Care Visits: 0-3 vs. > 3	Social Q2	345.435	347.449	0.2425	0.2437	2.0141	0.365295	0.0012	0.007857
Specialty Care Visits: 0-3 vs. > 3	Fatigue Q4	269.684	271.665	0.195	0.1963	1.9806	0.371465	0.0013	0.008214
Specialty Care Visits: 0-3 vs. > 3	Sleep Q4	66.8564	68.2704	0.0534	0.0545	1.414	0.493121	0.0011	0.008571
Specialty Care Visits: 0-3 vs. > 3	Physical Function Q3	418.505	419.437	0.283	0.2836	0.9317	0.627601	0.0006	0.008929
Specialty Care Visits: 0-3 vs. > 3	Sleep Q1	82.2809	82.9588	0.0633	0.0638	0.6779	0.712518	0.0005	0.009286
Specialty Care Visits: 0-3 vs. > 3	Fatigue Q3	261.098	261.609	0.189	0.1893	0.511	0.774529	0.0003	0.009643
Specialty Care Visits: 0-3 vs. > 3	Fatigue Q2	296.937	297.072	0.2116	0.2117	0.1359	0.934307	0.0001	0.01
Stroke: Has vs. Does not have	Sleep Q2	98.0452	103.966	0.0747	0.079	5.921	0.051793	0.0043	0.000357
Stroke: Has vs. Does not have	Sleep Q3	101.84	107.671	0.0783	0.0826	5.8319	0.0541526	0.0043	0.000714
Stroke: Has vs. Does not have	Fatigue Q4	269.396	275.18	0.1948	0.1986	5.784	0.0554652	0.0038	0.001071
Stroke: Has vs. Does not have	Social Q4	367.125	372.876	0.2578	0.2613	5.7514	0.0563767	0.0035	0.001429
Stroke: Has vs. Does not have	Anxiety Q1	137.344	142.41	0.1111	0.115	5.0655	0.0794403	0.0039	0.001786
Stroke: Has vs. Does not have	Social Q2	341.358	346.248	0.24	0.243	4.8898	0.0867348	0.003	0.002143
Stroke: Has vs. Does not have	Physical Function Q4	556.374	560.8	0.3613	0.3636	4.4266	0.109339	0.0023	0.0025
Stroke: Has vs. Does not have	Depression Q2	295.021	299.303	0.2228	0.2257	4.2816	0.117561	0.0029	0.002857
Stroke: Has vs. Does not have	Sleep Q4	67.9926	71.9125	0.0543	0.0573	3.9199	0.140865	0.003	0.003214
Stroke: Has vs. Does not have	Physical Function Q2	447.128	450.86	0.297	0.2991	3.7325	0.154703	0.0021	0.003571
Stroke: Has vs. Does not have	Depression Q1	190.768	194.488	0.1555	0.1583	3.7208	0.15561	0.0028	0.003929
Stroke: Has vs. Does not have	Fatigue Q3	262.279	265.96	0.1897	0.1922	3.681	0.158738	0.0025	0.004286
Stroke: Has vs. Does not have	Anxiety Q2	214.741	218.261	0.1723	0.1749	3.5201	0.172036	0.0026	0.004643
Stroke: Has vs. Does not have	Pain Q1	263.507	266.283	0.1899	0.1917	2.7762	0.249549	0.0018	0.005
Stroke: Has vs. Does not have	Physical Function Q3	421.42	424.148	0.2847	0.2863	2.7279	0.255649	0.0016	0.005357
Stroke: Has vs. Does not have	Social Q3	352.727	355.149	0.2469	0.2484	2.4221	0.297884	0.0015	0.005714
Stroke: Has vs. Does not have	Anxiety Q3	232.378	234.79	0.1843	0.1861	2.4123	0.299348	0.0018	0.006071
Stroke: Has vs. Does not have	Sleep Q1	84.5378	86.7498	0.0649	0.0666	2.212	0.33088	0.0017	0.006429
Stroke: Has vs. Does not have	Pain Q3	277.771	279.909	0.2067	0.2081	2.1376	0.34342	0.0014	0.006786
Stroke: Has vs. Does not have	Pain Q4	278.244	279.718	0.2032	0.2042	1.4736	0.478643	0.001	0.007143
Stroke: Has vs. Does not have	Fatigue Q2	296.215	297.432	0.2112	0.2119	1.2171	0.544139	0.0007	0.0075
Stroke: Has vs. Does not have	Pain Q2	285.61	286.632	0.2062	0.2069	1.0219	0.599925	0.0007	0.007857
Stroke: Has vs. Does not have	Depression Q4	242.715	243.709	0.1988	0.1995	0.9944	0.608231	0.0007	0.008214
Stroke: Has vs. Does not have	Fatigue Q1	269.723	270.551	0.1934	0.1939	0.8281	0.660968	0.0005	0.008571
Stroke: Has vs. Does not have	Anxiety Q4	216.223	216.743	0.1647	0.1651	0.5198	0.771129	0.0004	0.008929
Stroke: Has vs. Does not have	Depression Q3	267.741	268.053	0.2017	0.2019	0.3123	0.855431	0.0002	0.009286
Stroke: Has vs. Does not have	Physical Function Q1	503.021	503.154	0.3267	0.3268	0.1331	0.935616	0.0001	0.009643
Stroke: Has vs. Does not have	Social Q1	302.014	302.123	0.2162	0.2163	0.109	0.946959	0.0001	0.01
Survey Mode: Mail vs. Phone	Depression Q1	117.008	139.777	0.1476	0.174	22.7686	1.13726e-05	0.0264	0.000357
Survey Mode: Mail vs. Phone	Depression Q3	177.188	198.42	0.2081	0.2302	21.2326	2.45132e-05	0.0221	0.000714
Survey Mode: Mail vs. Phone	Depression Q2	170.329	188.16	0.2009	0.2197	17.8302	0.000134345	0.0188	0.001071
Survey Mode: Mail vs. Phone	Depression Q4	141.056	158.331	0.183	0.2034	17.2749	0.000177339	0.0204	0.001429
Survey Mode: Mail vs. Phone	Anxiety Q1	83.5997	95.2506	0.1067	0.1208	11.6509	0.00295148	0.0141	0.001786
Survey Mode: Mail vs. Phone	Anxiety Q2	123.032	134.668	0.1558	0.1694	11.6352	0.00297474	0.0136	0.002143
Survey Mode: Mail vs. Phone	Anxiety Q3	145.266	156.601	0.1816	0.1945	11.3353	0.00345598	0.0129	0.0025
Survey Mode: Mail vs. Phone	Anxiety Q4	151.142	162.073	0.1797	0.1915	10.9308	0.00423065	0.0118	0.002857
Survey Mode: Mail vs. Phone	Social Q2	213.895	224.819	0.2373	0.2478	10.9239	0.00424527	0.0105	0.003214
Survey Mode: Mail vs. Phone	Social Q3	211.975	219.378	0.2359	0.2431	7.4033	0.0246828	0.0072	0.003571
Survey Mode: Mail vs. Phone	Sleep Q4	37.9265	44.9519	0.0477	0.0563	7.0254	0.0298163	0.0086	0.003929
Survey Mode: Mail vs. Phone	Fatigue Q2	176.356	182.312	0.198	0.204	5.9563	0.0508869	0.006	0.004286
Survey Mode: Mail vs. Phone	Social Q4	214.782	219.655	0.2403	0.2451	4.8729	0.0874708	0.0048	0.004643
Survey Mode: Mail vs. Phone	Fatigue Q3	156.626	159.823	0.1779	0.1812	3.1974	0.202159	0.0033	0.005
Survey Mode: Mail vs. Phone	Sleep Q1	50.7963	53.9371	0.0613	0.0649	3.1408	0.207962	0.0036	0.005357
Survey Mode: Mail vs. Phone	Social Q1	173.065	176.152	0.1972	0.2004	3.0873	0.2136	0.0032	0.005714
Survey Mode: Mail vs. Phone	Physical Function Q3	247.636	250.396	0.2648	0.2673	2.7602	0.251553	0.0025	0.006071
Survey Mode: Mail vs. Phone	Pain Q2	188.151	190.752	0.2136	0.2162	2.6012	0.272368	0.0026	0.006429
Survey Mode: Mail vs. Phone	Pain Q1	170.072	172.204	0.1927	0.1949	2.1322	0.344349	0.0022	0.006786
Survey Mode: Mail vs. Phone	Fatigue Q1	181.165	183.275	0.2025	0.2047	2.1101	0.348175	0.0022	0.007143
Survey Mode: Mail vs. Phone	Fatigue Q4	149.442	150.946	0.171	0.1726	1.5044	0.471328	0.0016	0.0075
Survey Mode: Mail vs. Phone	Pain Q3	168.196	169.357	0.1969	0.1981	1.1612	0.559563	0.0012	0.007857
Survey Mode: Mail vs. Phone	Sleep Q3	71.0939	71.7563	0.0858	0.0866	0.6624	0.718062	0.0008	0.008214
Survey Mode: Mail vs. Phone	Physical Function Q2	296.674	297.311	0.3056	0.3062	0.6367	0.727348	0.0006	0.008571
Survey Mode: Mail vs. Phone	Physical Function Q1	310.695	311.213	0.3174	0.3178	0.5176	0.771977	0.0004	0.008929
Survey Mode: Mail vs. Phone	Pain Q4	177.338	177.748	0.2049	0.2053	0.4101	0.814607	0.0004	0.009286
Survey Mode: Mail vs. Phone	Sleep Q2	52.0144	52.1225	0.0626	0.0627	0.1081	0.947385	0.0001	0.009643
Survey Mode: Mail vs. Phone	Physical Function Q4	355.634	355.663	0.3601	0.3601	0.0287	0.985752	0	0.01
Survey Mode: Web vs. Mail	Depression Q1	108.6	118.868	0.1369	0.1489	10.2687	0.00589088	0.012	0.000357
Survey Mode: Web vs. Mail	Fatigue Q1	136.716	146.656	0.1553	0.1657	9.9394	0.00694523	0.0104	0.000714
Survey Mode: Web vs. Mail	Depression Q2	183.21	189.441	0.2153	0.2219	6.2301	0.0443763	0.0066	0.001071
Survey Mode: Web vs. Mail	Anxiety Q4	120.875	125.157	0.1442	0.149	4.2825	0.117508	0.0048	0.001429
Survey Mode: Web vs. Mail	Physical Function Q4	354.413	357.982	0.3593	0.3622	3.5688	0.167898	0.0029	0.001786
Survey Mode: Web vs. Mail	Physical Function Q3	259.363	261.998	0.2744	0.2768	2.6355	0.267737	0.0024	0.002143
Survey Mode: Web vs. Mail	Sleep Q3	63.7002	66.3336	0.0764	0.0795	2.6334	0.268018	0.0031	0.0025
Survey Mode: Web vs. Mail	Fatigue Q3	158.099	160.667	0.1794	0.182	2.5682	0.2769	0.0026	0.002857
Survey Mode: Web vs. Mail	Pain Q3	182.961	185.298	0.2122	0.2146	2.3368	0.310864	0.0024	0.003214
Survey Mode: Web vs. Mail	Sleep Q1	56.0246	57.9904	0.0668	0.069	1.9658	0.374224	0.0022	0.003571
Survey Mode: Web vs. Mail	Social Q1	203.381	205.191	0.225	0.2267	1.8098	0.404582	0.0017	0.003929
Survey Mode: Web vs. Mail	Fatigue Q4	190.078	191.651	0.2122	0.2138	1.5733	0.455368	0.0016	0.004286
Survey Mode: Web vs. Mail	Physical Function Q1	316.791	318.346	0.3207	0.322	1.5545	0.459668	0.0013	0.004643
Survey Mode: Web vs. Mail	Sleep Q4	52.048	53.4405	0.0643	0.0659	1.3925	0.498451	0.0016	0.005
Survey Mode: Web vs. Mail	Anxiety Q2	148.566	149.923	0.1827	0.1842	1.3575	0.507251	0.0015	0.005357
Survey Mode: Web vs. Mail	Anxiety Q1	88.2681	89.566	0.1098	0.1113	1.2979	0.522594	0.0015	0.005714
Survey Mode: Web vs. Mail	Pain Q1	148.707	149.993	0.1691	0.1704	1.2857	0.525792	0.0013	0.006071
Survey Mode: Web vs. Mail	Social Q4	259.008	260.182	0.2797	0.2808	1.1738	0.556048	0.0011	0.006429
Survey Mode: Web vs. Mail	Social Q2	218.605	219.371	0.2395	0.2403	0.7656	0.681949	0.0008	0.006786
Survey Mode: Web vs. Mail	Pain Q4	184.66	185.411	0.2085	0.2092	0.7511	0.686911	0.0007	0.007143
Survey Mode: Web vs. Mail	Pain Q2	162.403	163.026	0.184	0.1847	0.6231	0.732311	0.0007	0.0075
Survey Mode: Web vs. Mail	Physical Function Q2	262.731	263.25	0.275	0.2755	0.5188	0.771514	0.0005	0.007857
Survey Mode: Web vs. Mail	Depression Q3	141.062	141.506	0.1672	0.1677	0.4433	0.801196	0.0005	0.008214
Survey Mode: Web vs. Mail	Depression Q4	138.203	138.576	0.1748	0.1753	0.3732	0.829776	0.0005	0.008571
Survey Mode: Web vs. Mail	Sleep Q2	70.9463	71.2448	0.0833	0.0836	0.2985	0.861354	0.0003	0.008929
Survey Mode: Web vs. Mail	Fatigue Q2	190.774	191.055	0.2111	0.2113	0.2812	0.868837	0.0002	0.009286
Survey Mode: Web vs. Mail	Anxiety Q3	130.768	131.026	0.1619	0.1622	0.2571	0.87937	0.0003	0.009643
Survey Mode: Web vs. Mail	Social Q3	239.432	239.588	0.2579	0.258	0.1562	0.924872	0.0001	0.01
Survey Mode: Web vs. Phone	Depression Q3	179.675	211.185	0.1909	0.2209	31.5096	1.43806e-07	0.03	0.000357
Survey Mode: Web vs. Phone	Anxiety Q4	127.303	154.134	0.137	0.1636	26.8301	1.49251e-06	0.0266	0.000714
Survey Mode: Web vs. Phone	Depression Q4	168.277	190.596	0.1954	0.2188	22.3184	1.42436e-05	0.0234	0.001071
Survey Mode: Web vs. Phone	Fatigue Q1	202.951	218.797	0.2019	0.216	15.8455	0.000362404	0.0141	0.001429
Survey Mode: Web vs. Phone	Anxiety Q3	173.498	187.728	0.1917	0.2059	14.2301	0.00081278	0.0142	0.001786
Survey Mode: Web vs. Phone	Social Q2	241.734	254.266	0.2356	0.2463	12.5312	0.00190057	0.0107	0.002143
Survey Mode: Web vs. Phone	Social Q3	245.876	257.511	0.24	0.2499	11.6346	0.00297563	0.0099	0.0025
Survey Mode: Web vs. Phone	Anxiety Q1	83.3301	94.6694	0.0953	0.1077	11.3393	0.00344907	0.0124	0.002857
Survey Mode: Web vs. Phone	Fatigue Q3	200.229	210.42	0.2007	0.2098	10.1913	0.00612333	0.0091	0.003214
Survey Mode: Web vs. Phone	Sleep Q1	52.6503	62.0136	0.0566	0.0664	9.3633	0.00926372	0.0098	0.003571
Survey Mode: Web vs. Phone	Fatigue Q2	215.174	224.486	0.2141	0.2223	9.3119	0.00950488	0.0082	0.003929
Survey Mode: Web vs. Phone	Anxiety Q2	140.242	147.7	0.1594	0.1673	7.4581	0.0240156	0.0079	0.004286
Survey Mode: Web vs. Phone	Social Q4	264.499	271.955	0.2569	0.2631	7.4557	0.0240445	0.0062	0.004643
Survey Mode: Web vs. Phone	Fatigue Q4	199.291	205.572	0.2001	0.2058	6.2804	0.0432741	0.0057	0.005
Survey Mode: Web vs. Phone	Pain Q2	212.982	219.224	0.2125	0.2181	6.2422	0.0441086	0.0056	0.005357
Survey Mode: Web vs. Phone	Sleep Q3	67.511	72.2645	0.0719	0.0768	4.7535	0.0928519	0.0049	0.005714
Survey Mode: Web vs. Phone	Physical Function Q3	322.478	326.658	0.301	0.3043	4.1802	0.123675	0.0033	0.006071
Survey Mode: Web vs. Phone	Depression Q2	218.821	222.89	0.2328	0.2367	4.0696	0.130707	0.0039	0.006429
Survey Mode: Web vs. Phone	Depression Q1	127.363	130.812	0.1499	0.1536	3.4495	0.178218	0.0037	0.006786
Survey Mode: Web vs. Phone	Physical Function Q4	391.153	394.189	0.3564	0.3587	3.0357	0.219183	0.0023	0.007143
Survey Mode: Web vs. Phone	Sleep Q4	42.4743	45.3804	0.0473	0.0504	2.9061	0.233856	0.0031	0.0075
Survey Mode: Web vs. Phone	Physical Function Q2	330.391	333.083	0.3053	0.3074	2.6922	0.260253	0.0021	0.007857
Survey Mode: Web vs. Phone	Pain Q1	203.029	205.287	0.201	0.203	2.2587	0.323243	0.002	0.008214
Survey Mode: Web vs. Phone	Social Q1	221.715	223.633	0.2199	0.2216	1.9176	0.383353	0.0017	0.008571
Survey Mode: Web vs. Phone	Pain Q3	201.034	202.559	0.2075	0.209	1.525	0.466499	0.0015	0.008929
Survey Mode: Web vs. Phone	Pain Q4	188.354	189.607	0.1914	0.1926	1.2533	0.534379	0.0012	0.009286
Survey Mode: Web vs. Phone	Physical Function Q1	370.452	371.002	0.3345	0.3349	0.5492	0.759876	0.0004	0.009643
Survey Mode: Web vs. Phone	Sleep Q2	72.4662	72.6796	0.077	0.0772	0.2134	0.898795	0.0002	0.01

## Sheet: Sheet1
Grouping Variable	Item Number	Model 1 Chi Square	Model 2 Chi Square	Model 3 Chi Square	Model 1 to Model 2 Chi Square	Model 2 to Model 3 Chi Square	Model 1 R Squared	Model 2 R Squared	Model 3 R Squared	Model 1 to Model 2 R Squared	Model 2 to Model 3 R Squared	Model 2 Coefficient (Grouping Variable)	Chi Square Difference	Prob Chi Sq	R Square Difference
Help Completing Survey: None vs. Any	Physical Function Q4	452.703	566.214	569.273	113.511	3.0592	0.3048	0.3665	0.368	0.0617	0.0015	1.9162	116.57	4.86449e-26	0.0632
